# Supplementary material for: Synthesis and Characterization of Abasic β-Diol-C-Nucleosides
Source: Preprints.org preprint supplement (doi:10.20944/preprints202304.0274.v1), 2023-04-12
Supplement: Supplementary file 4 [file supplementary]

Synthesis of abasic β-diol-C-nucleosides

Maria Moccia,a Linda Piras,a Michele Savianoa and Mauro F. A. Adamob*

1. National Research Council-Institute of Crystallography, Department of Chemistry, via G. Amendola 122/O, 70126 Bari, Italy. E-mail: maria.moccia@cnr.it
2. Centre for Synthesis and Chemical Biology (CSCB), Department of Pharmaceutical and Medicinal Chemistry, the Royal College of Surgeons in Ireland, 123 St. Stephen’s Green, Dublin 2, Ireland, Fax: (+353) 1 4022168 E-mail: [madamo@rcsi.ie](mailto:madamo@rcsi.ie).

Supporting information

4
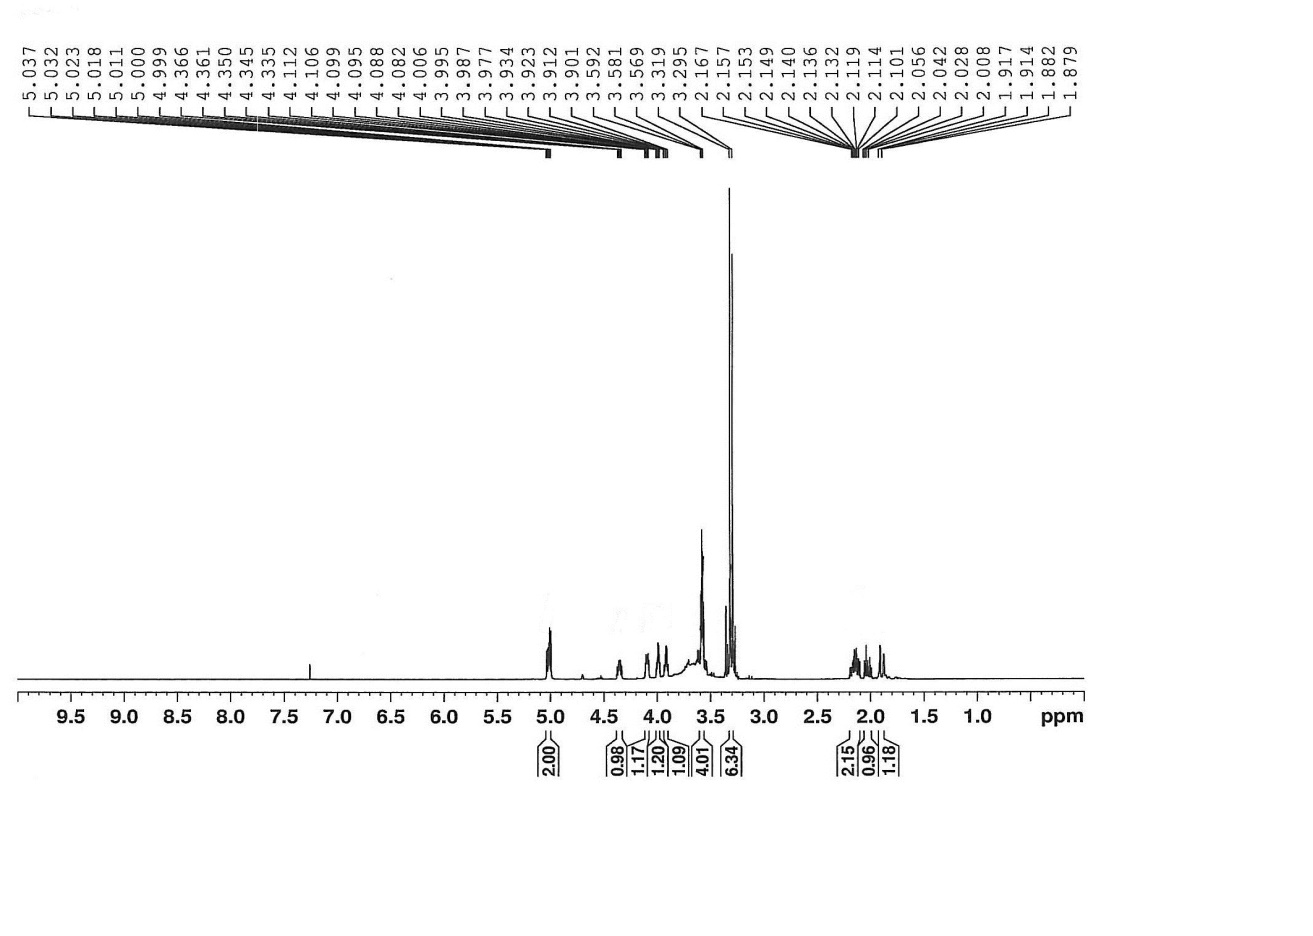


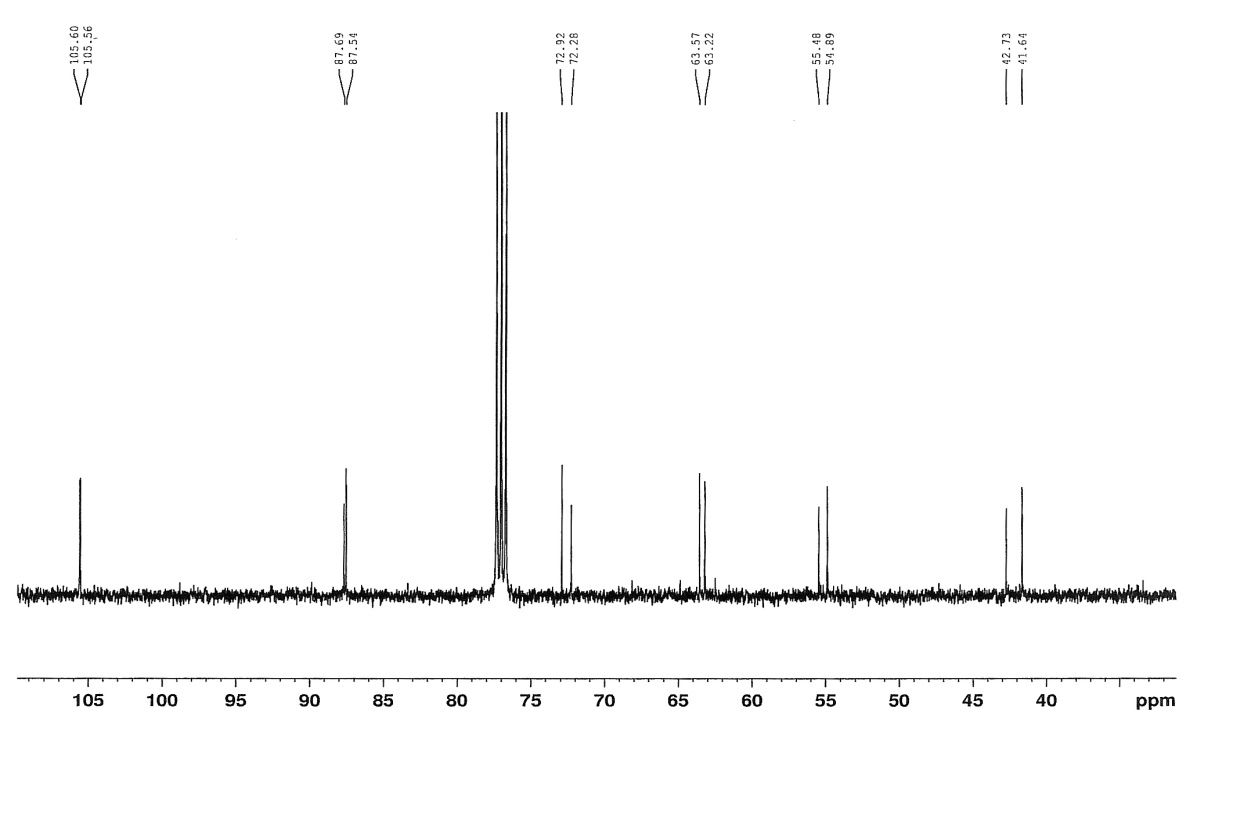


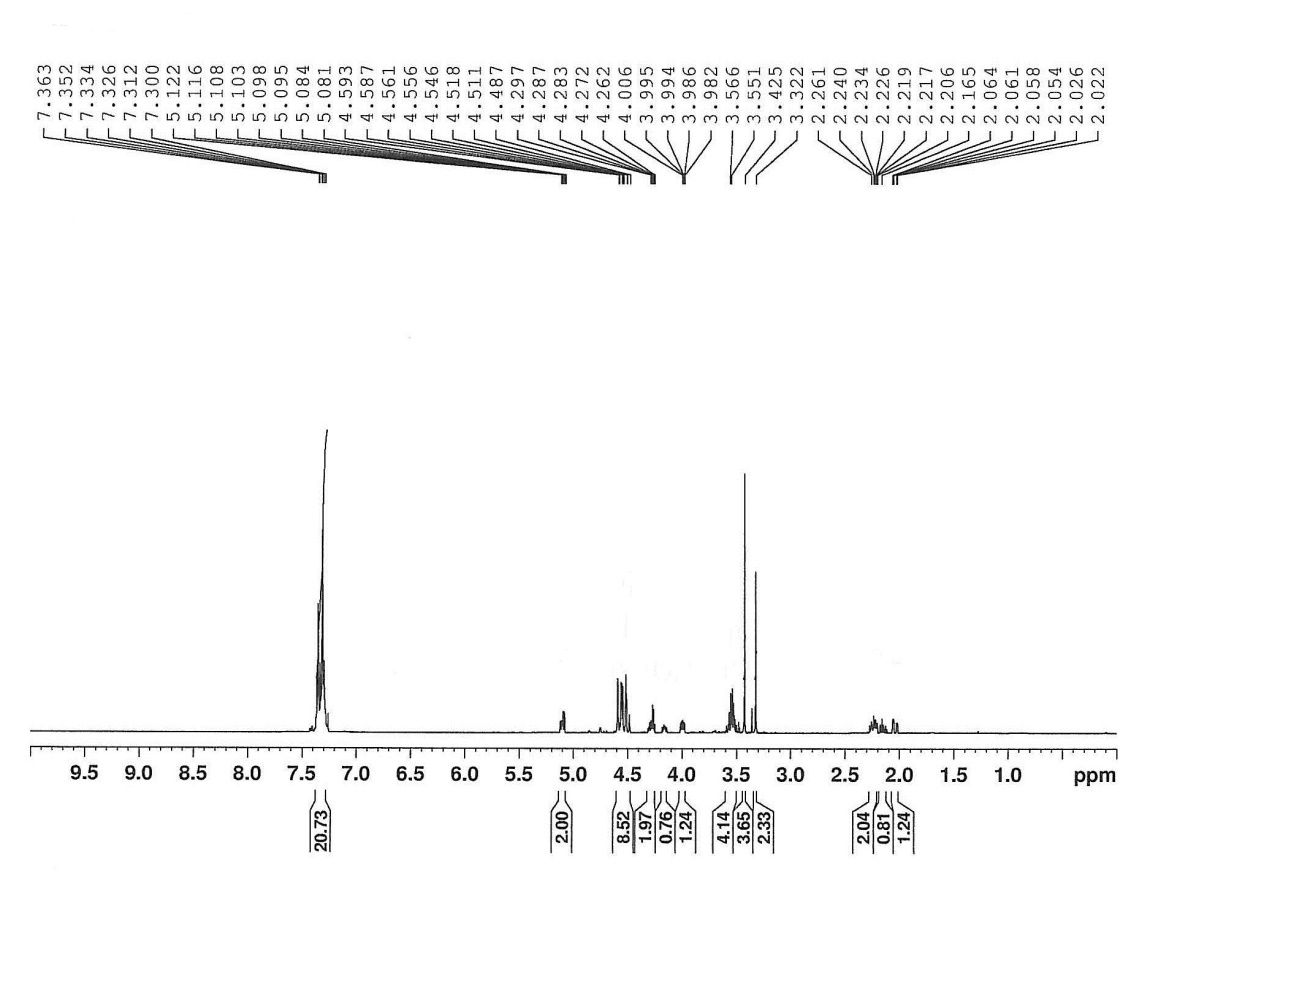


**5**


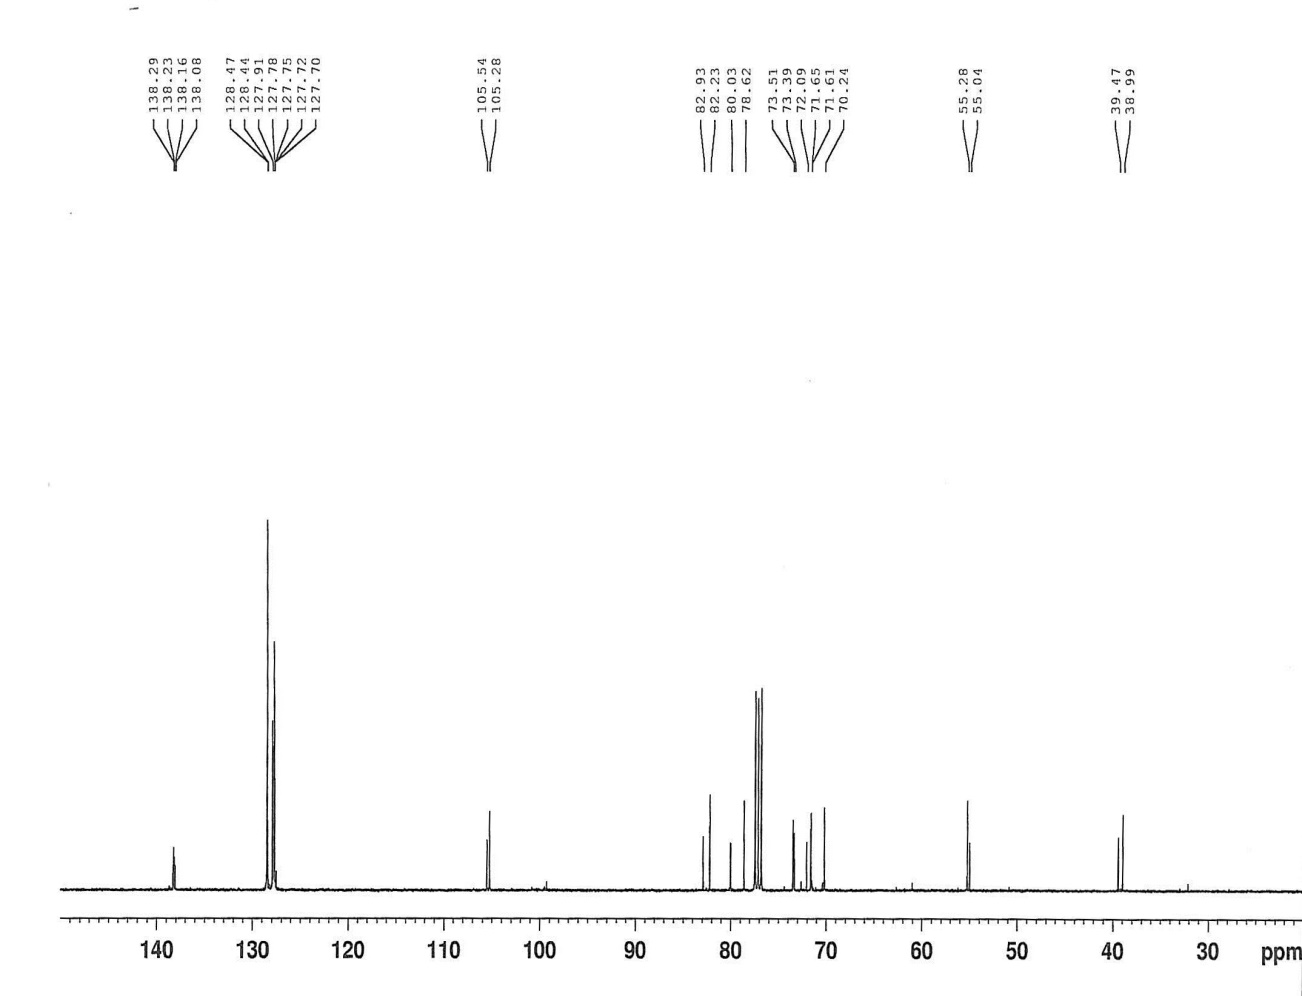


6
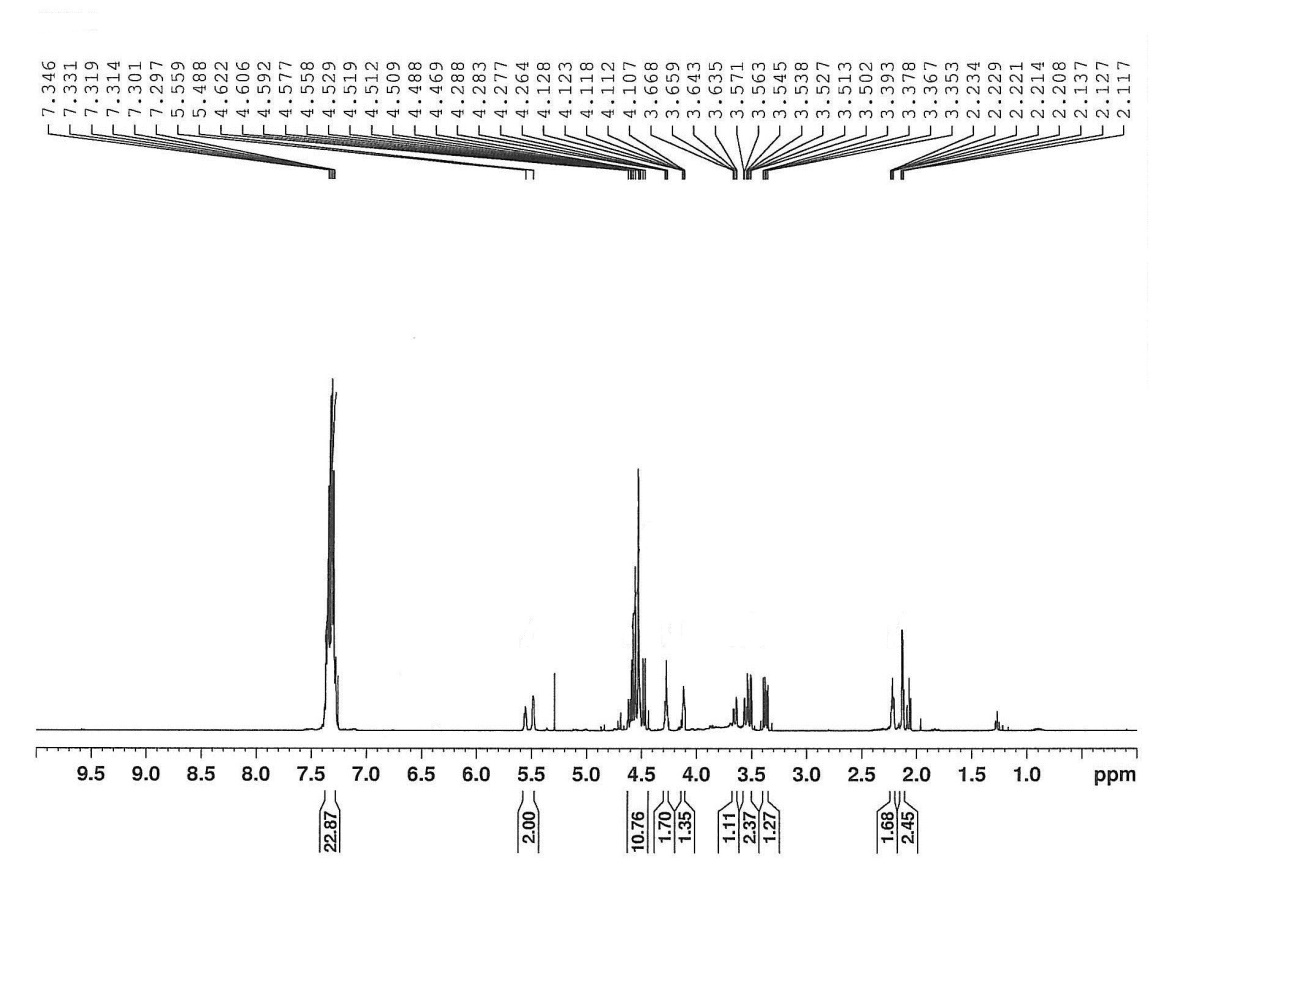


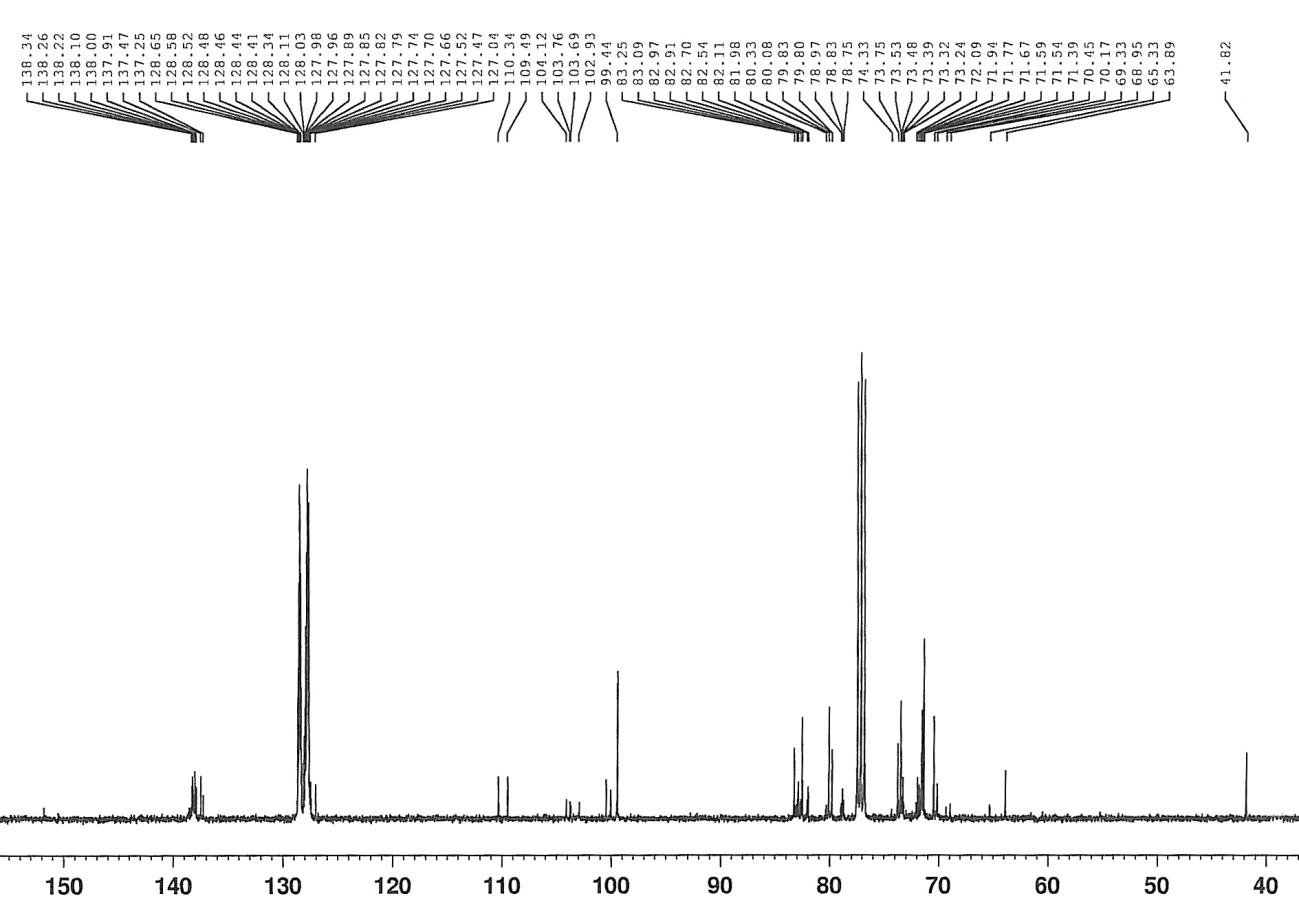


7
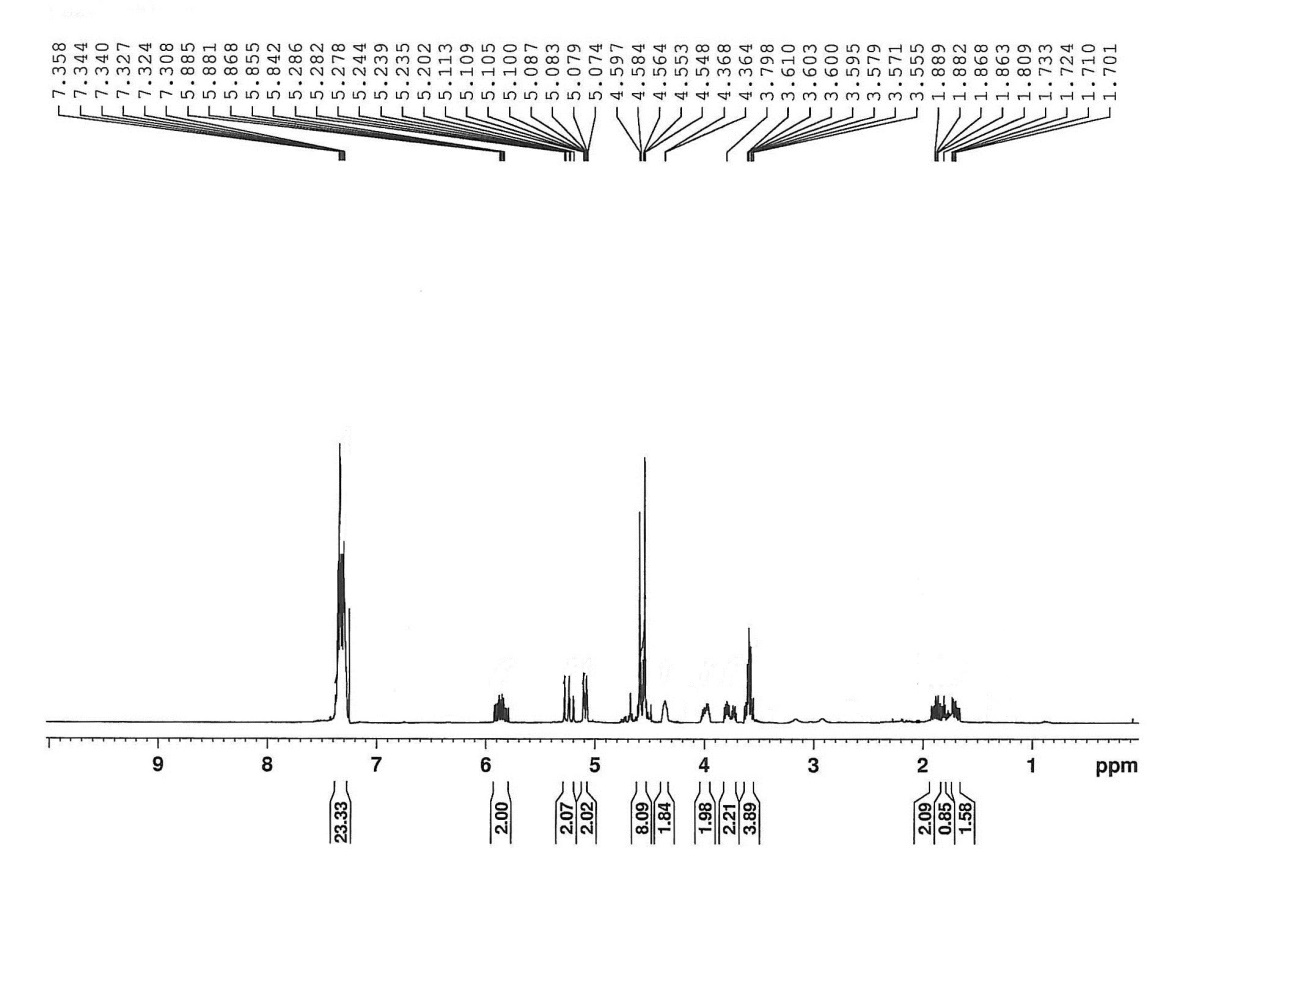


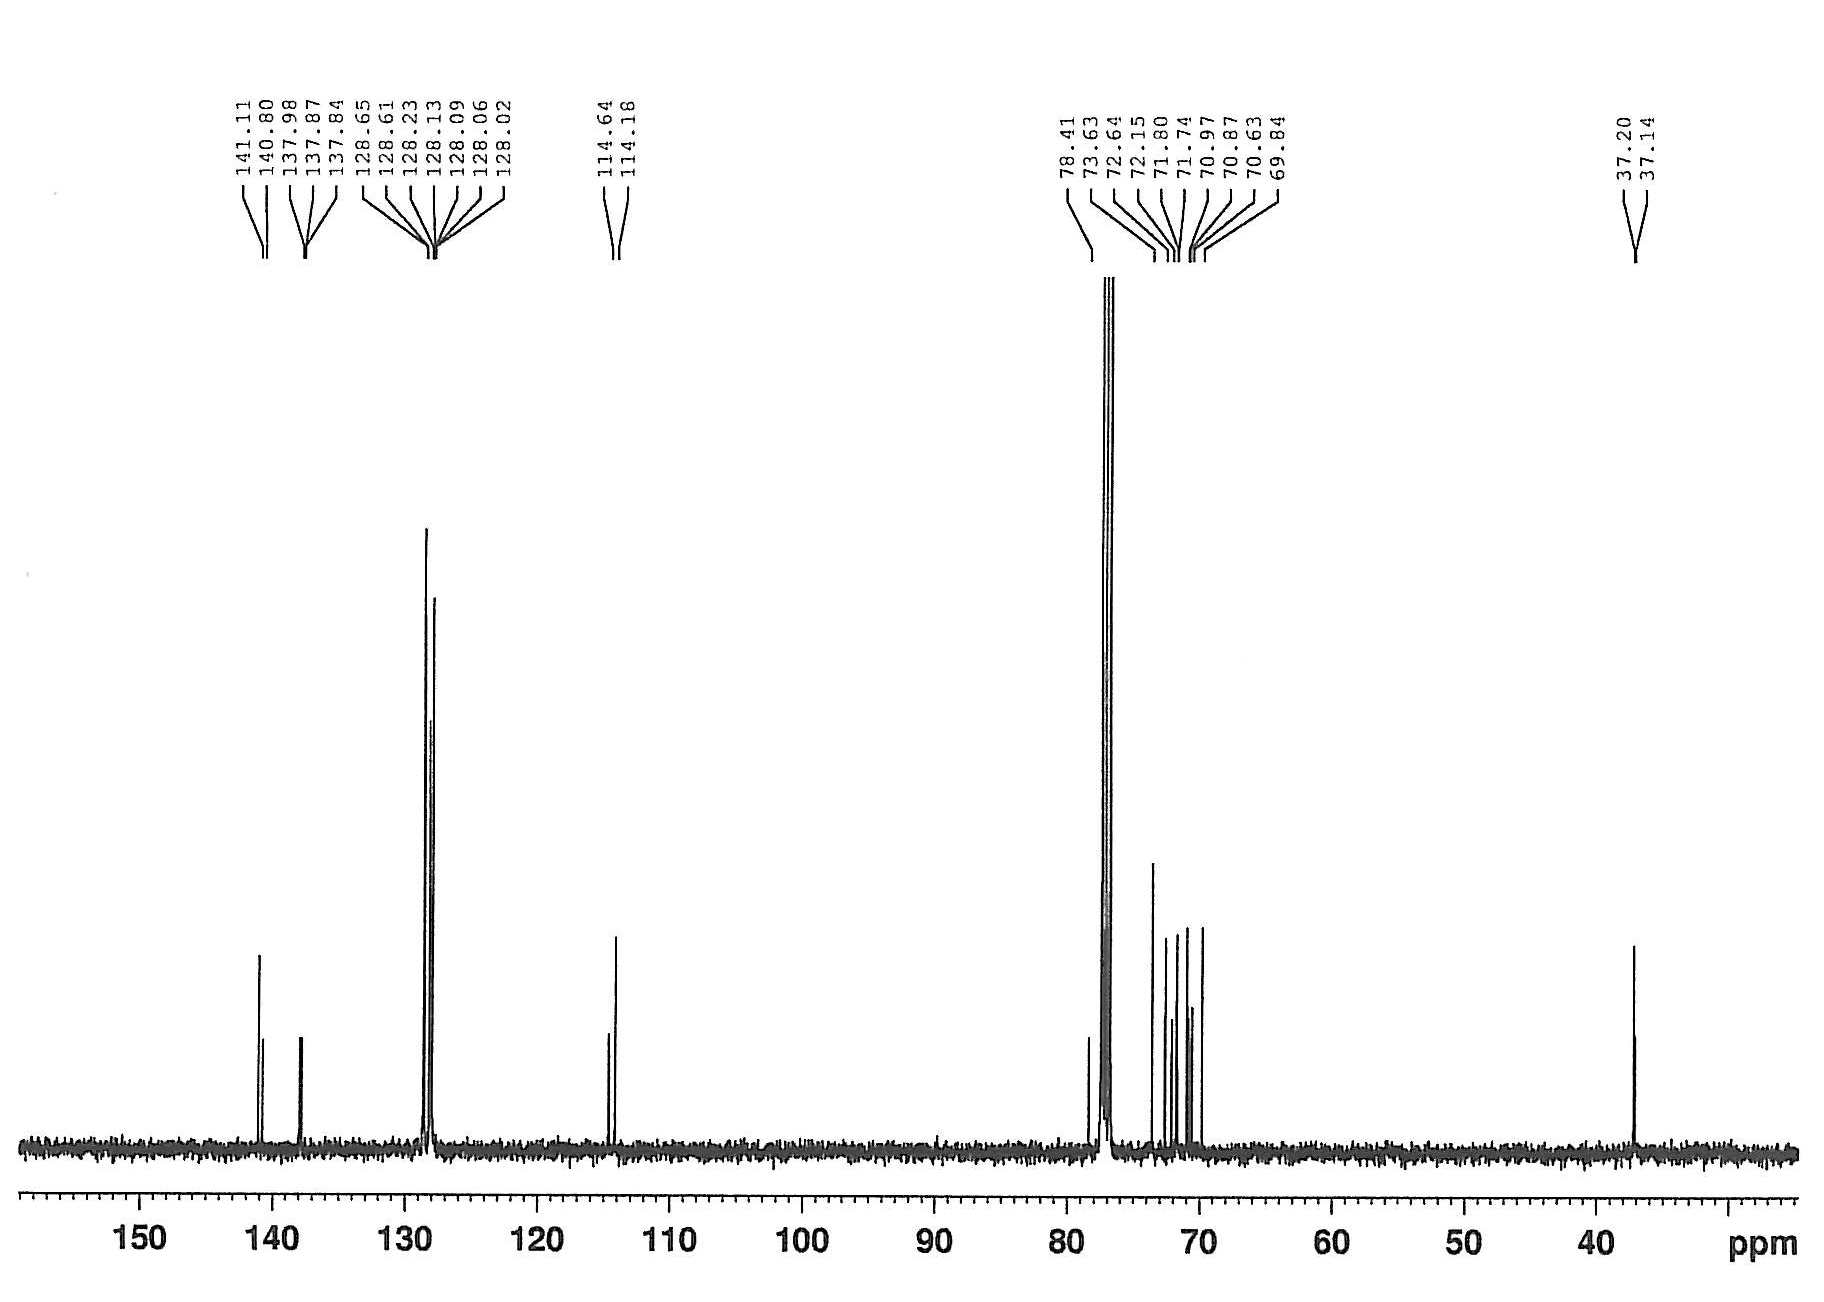


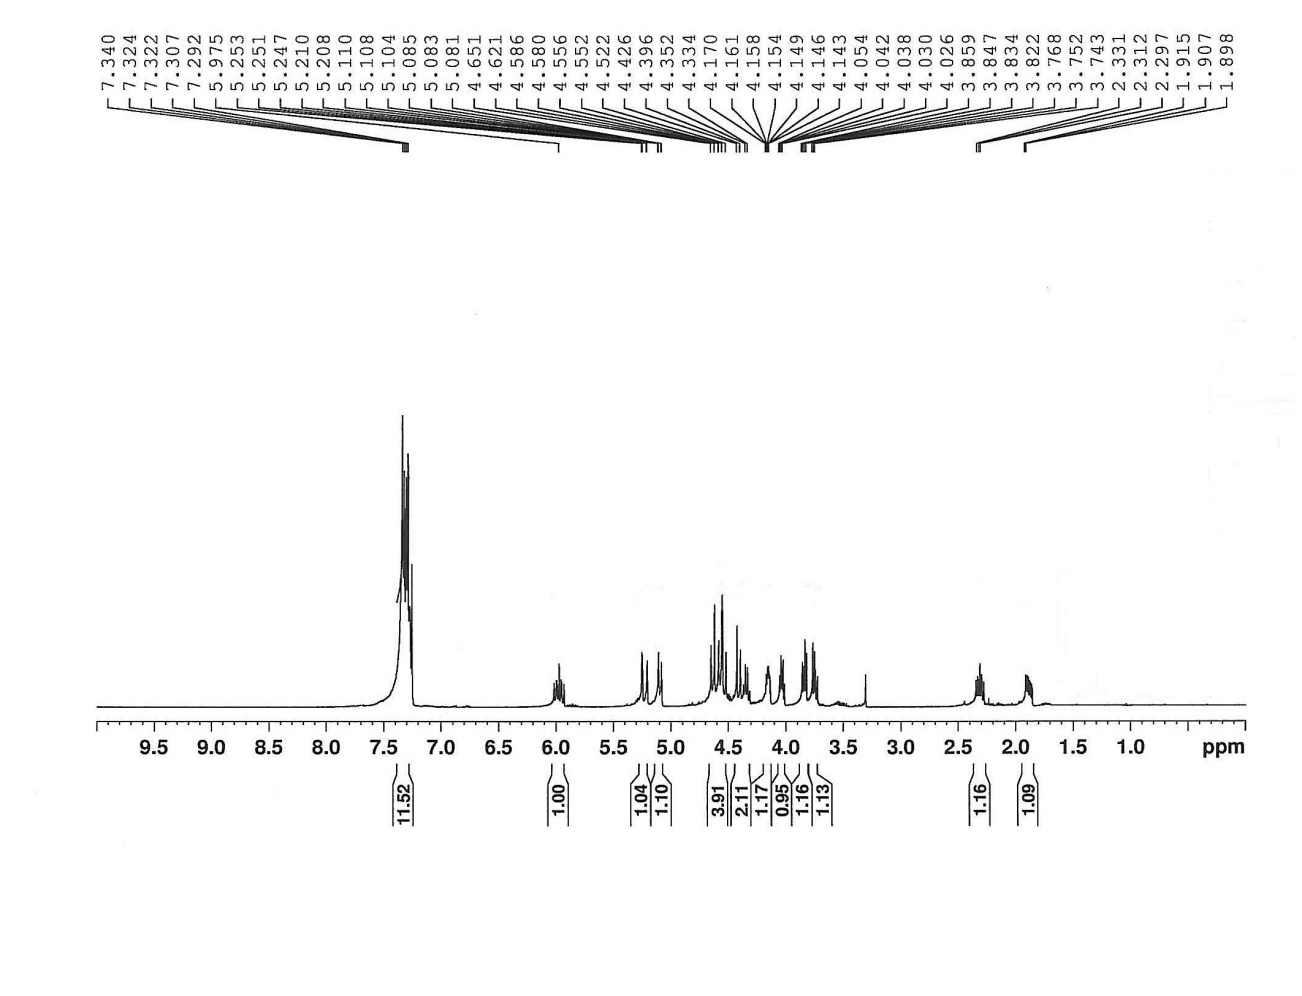


**8b**


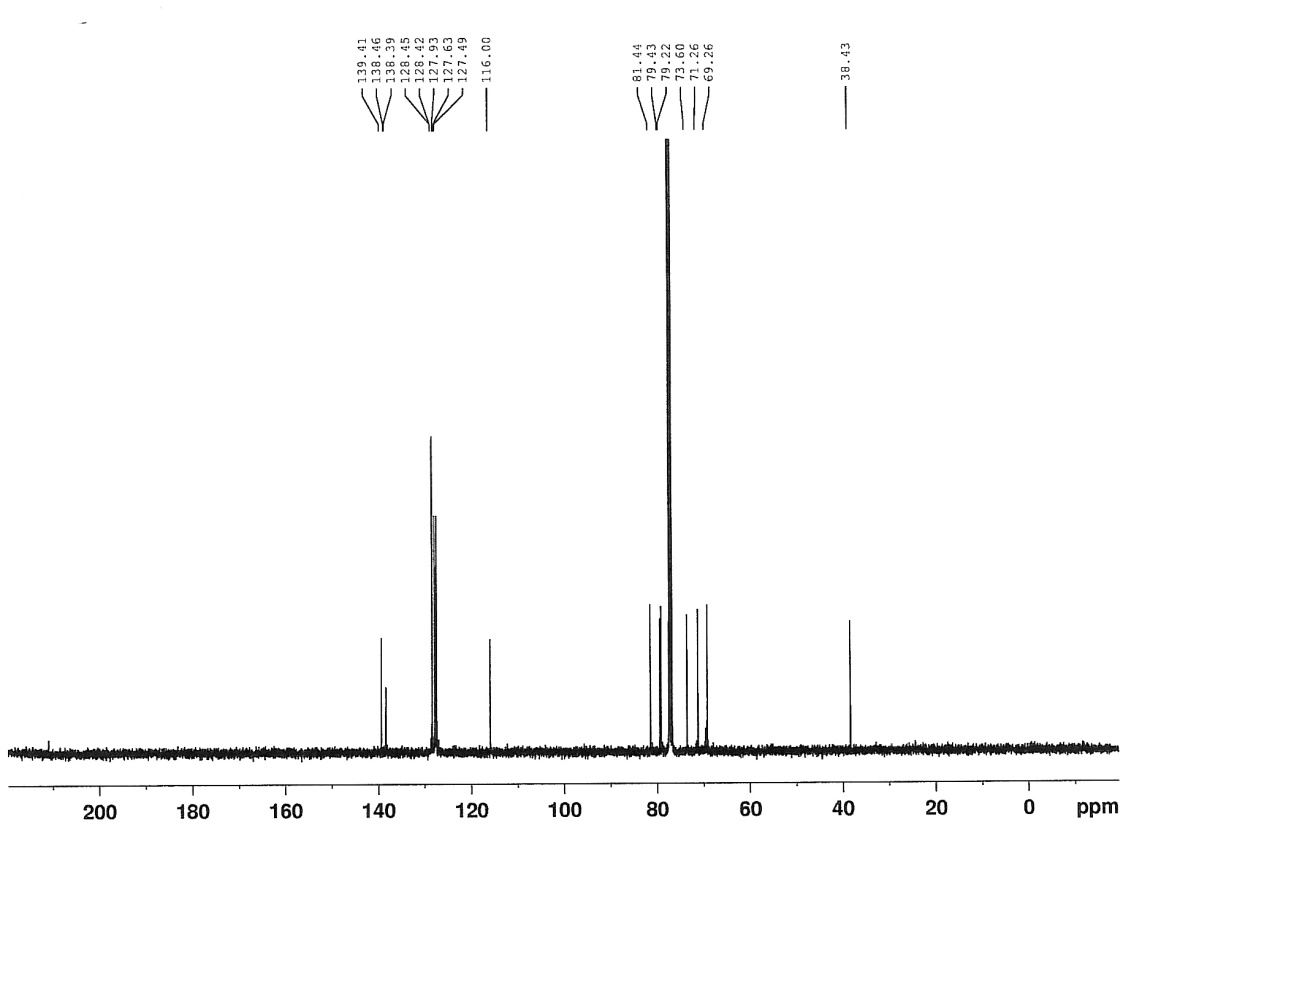


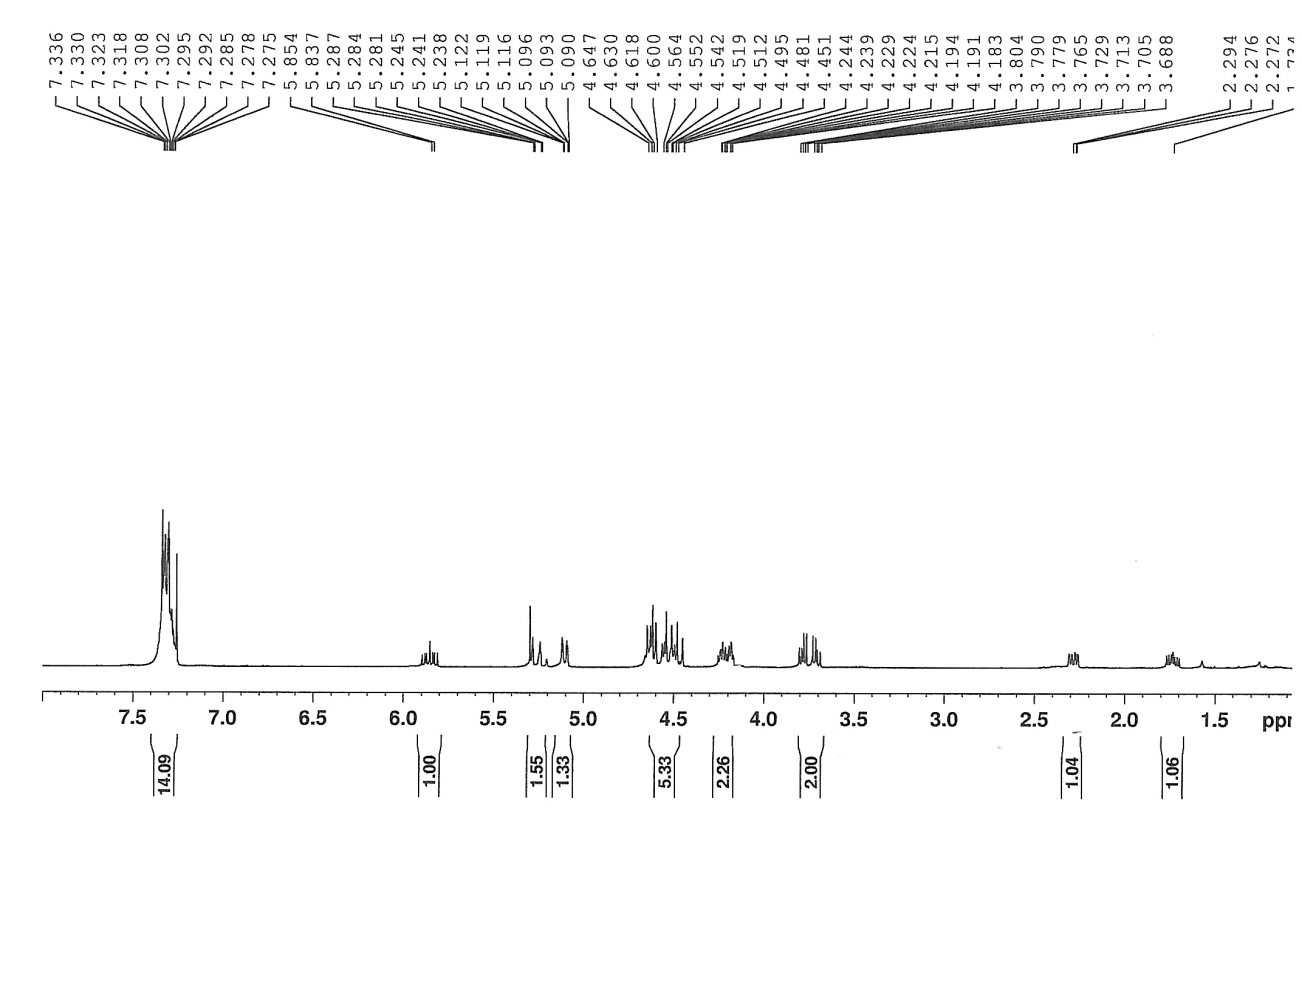


8a


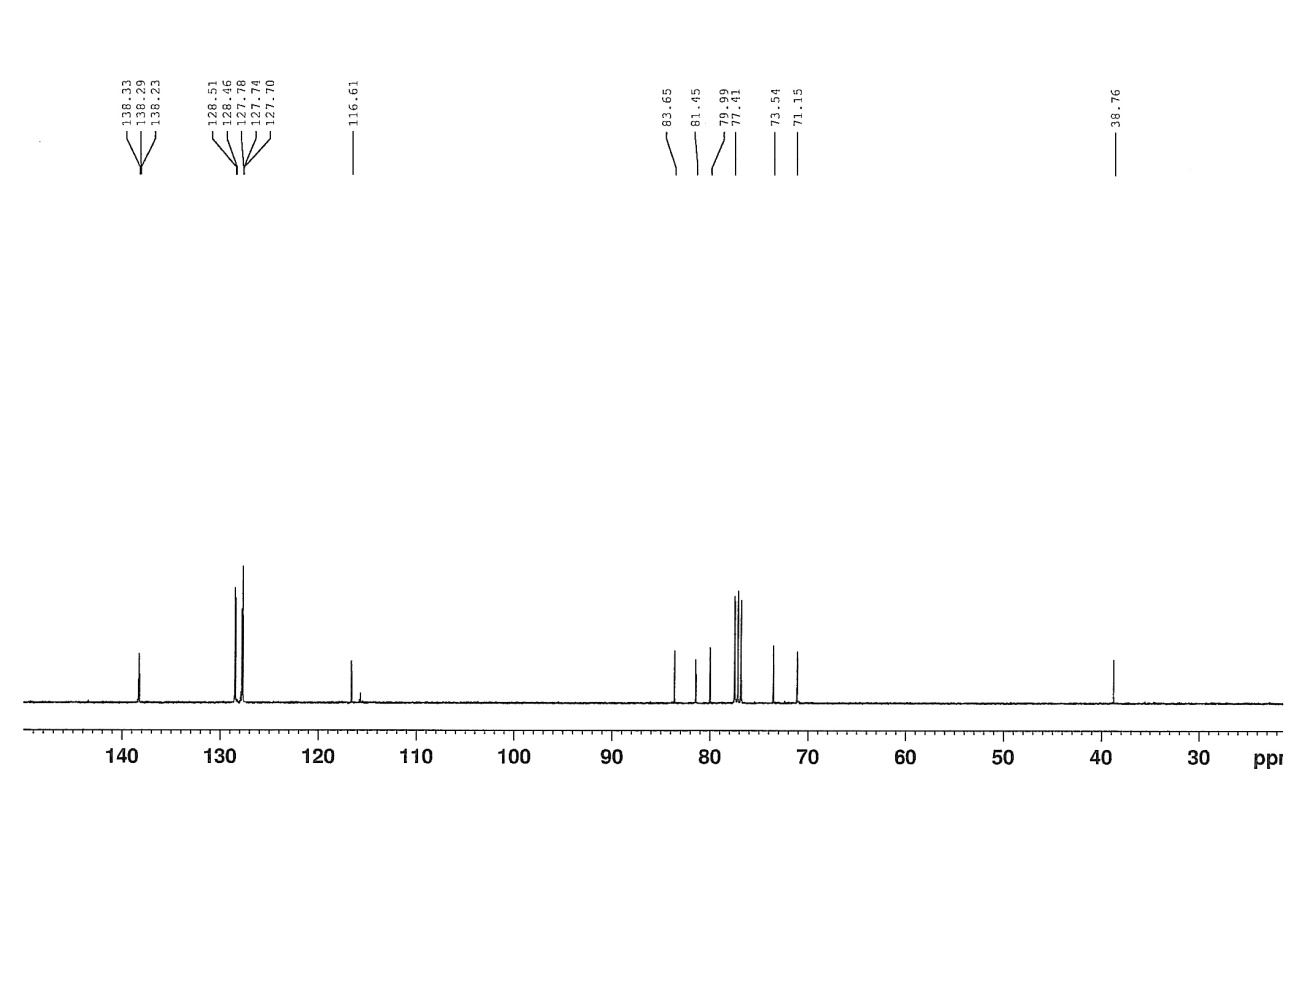


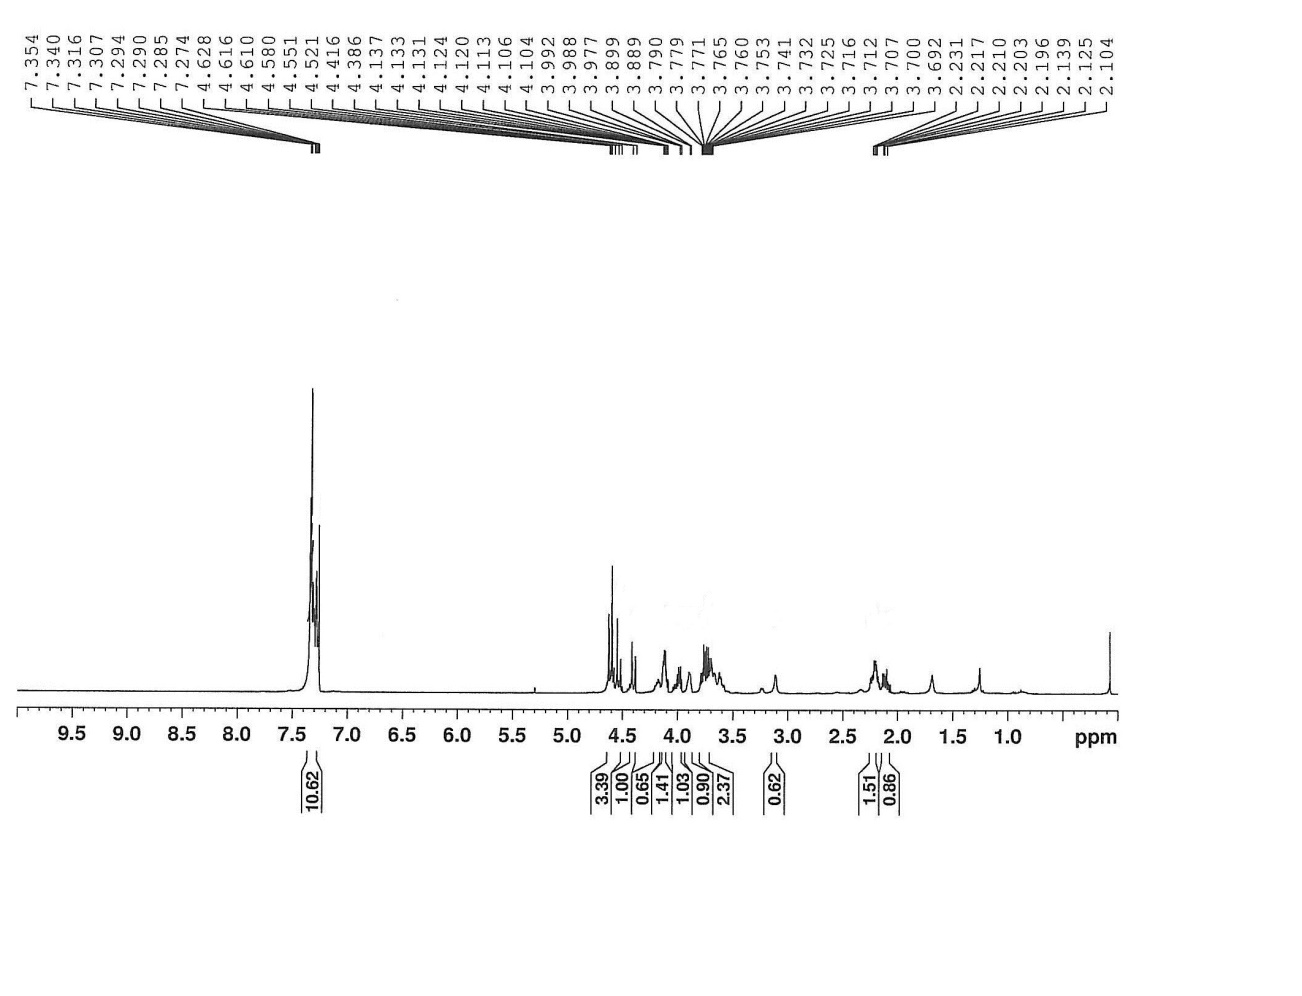


**9**a/b


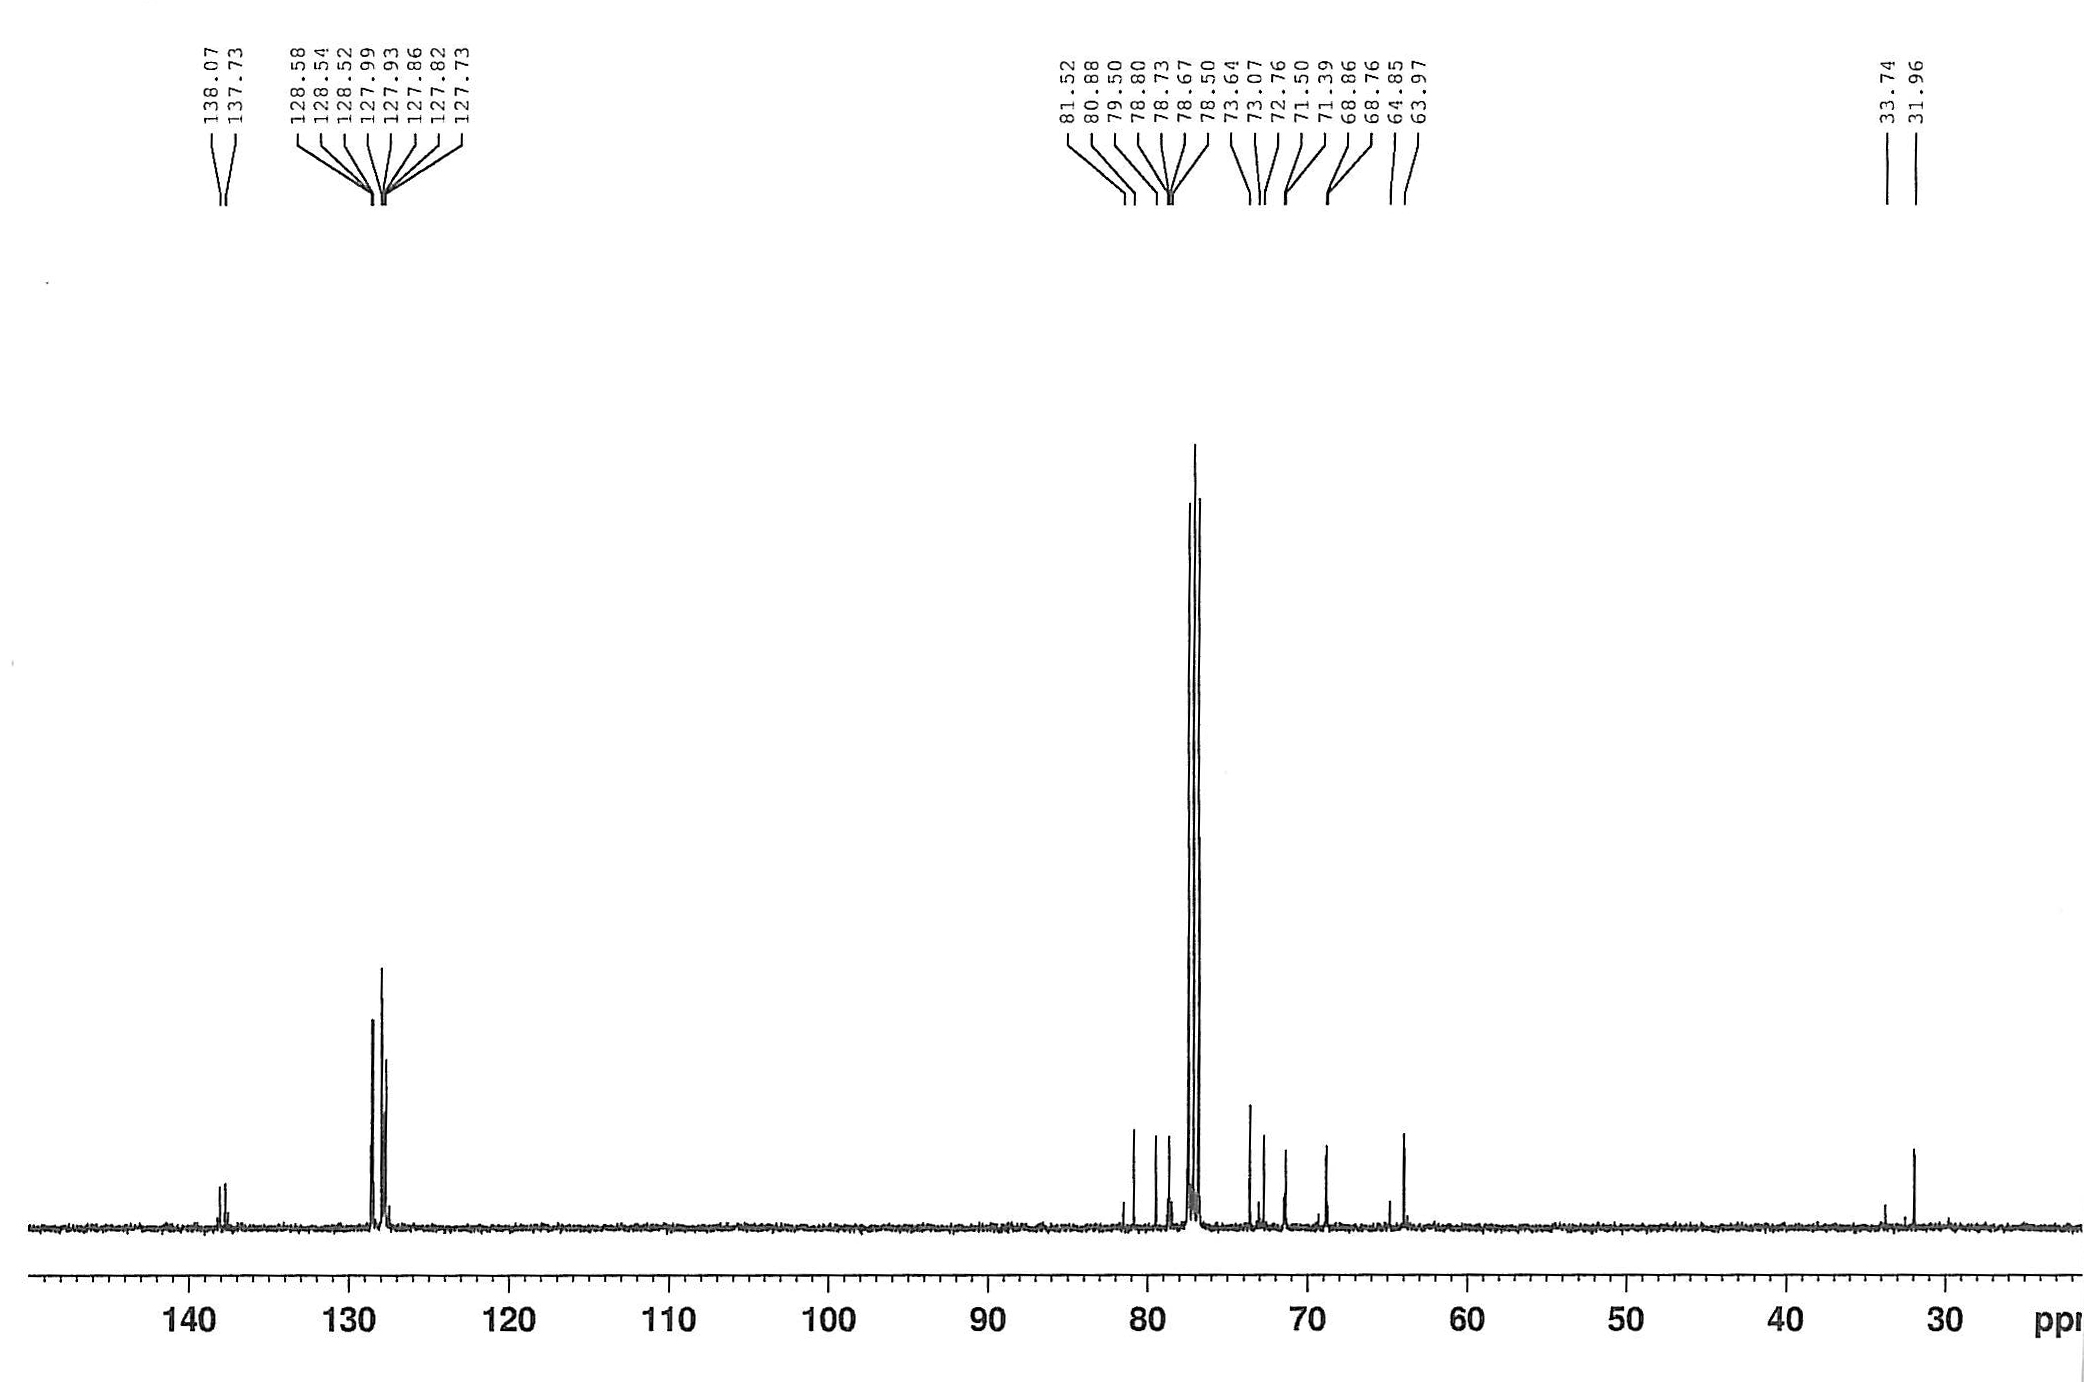


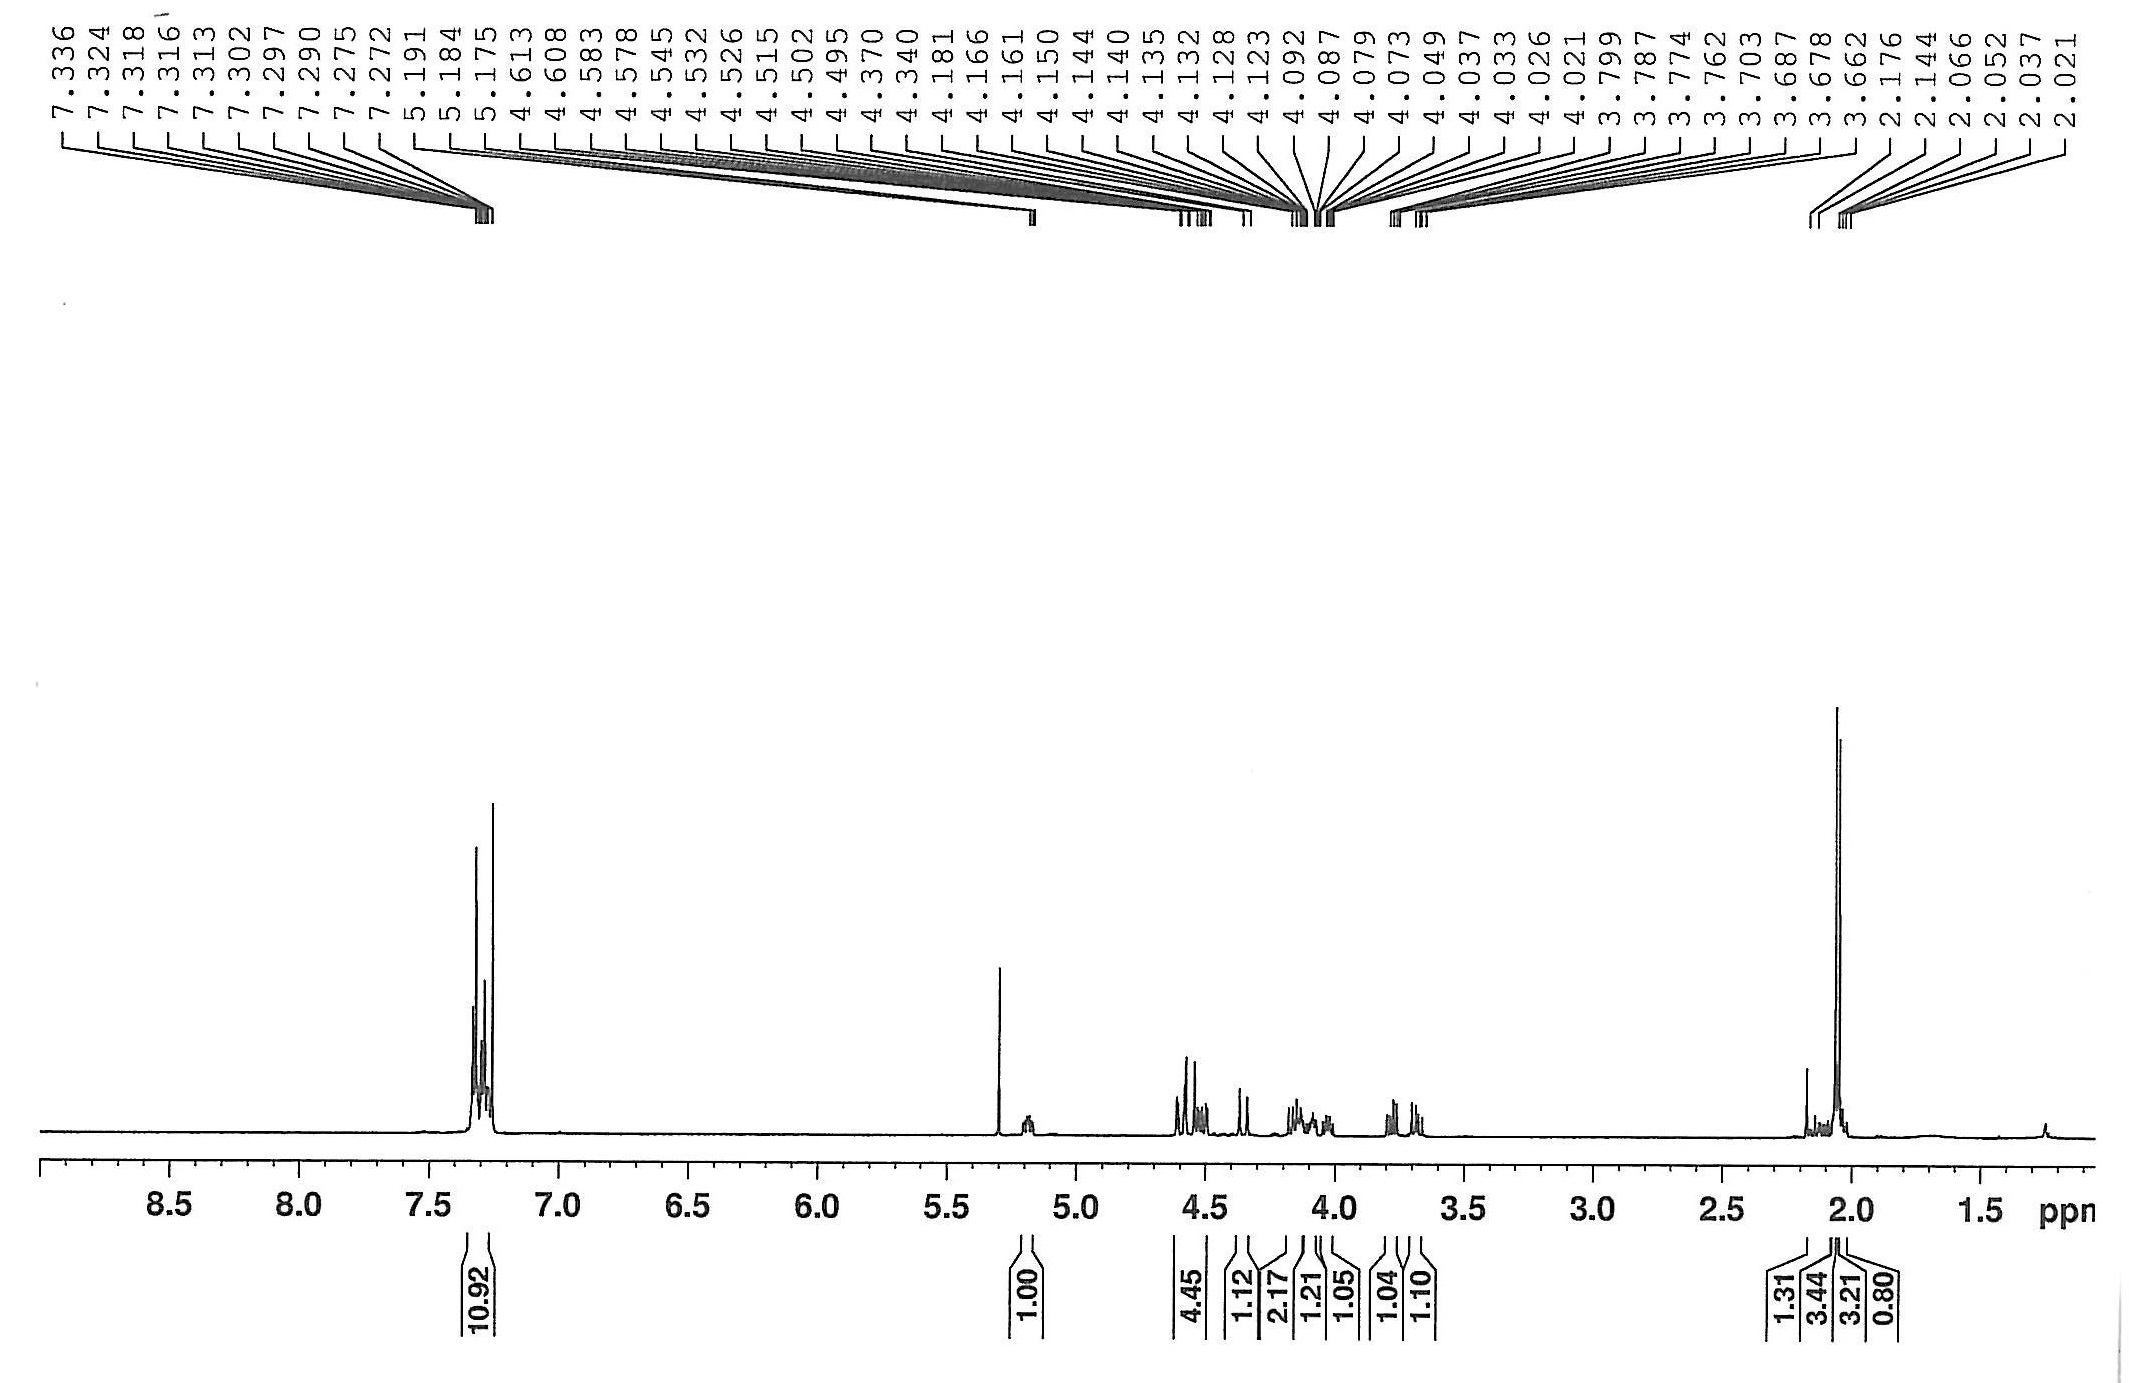


**10a**


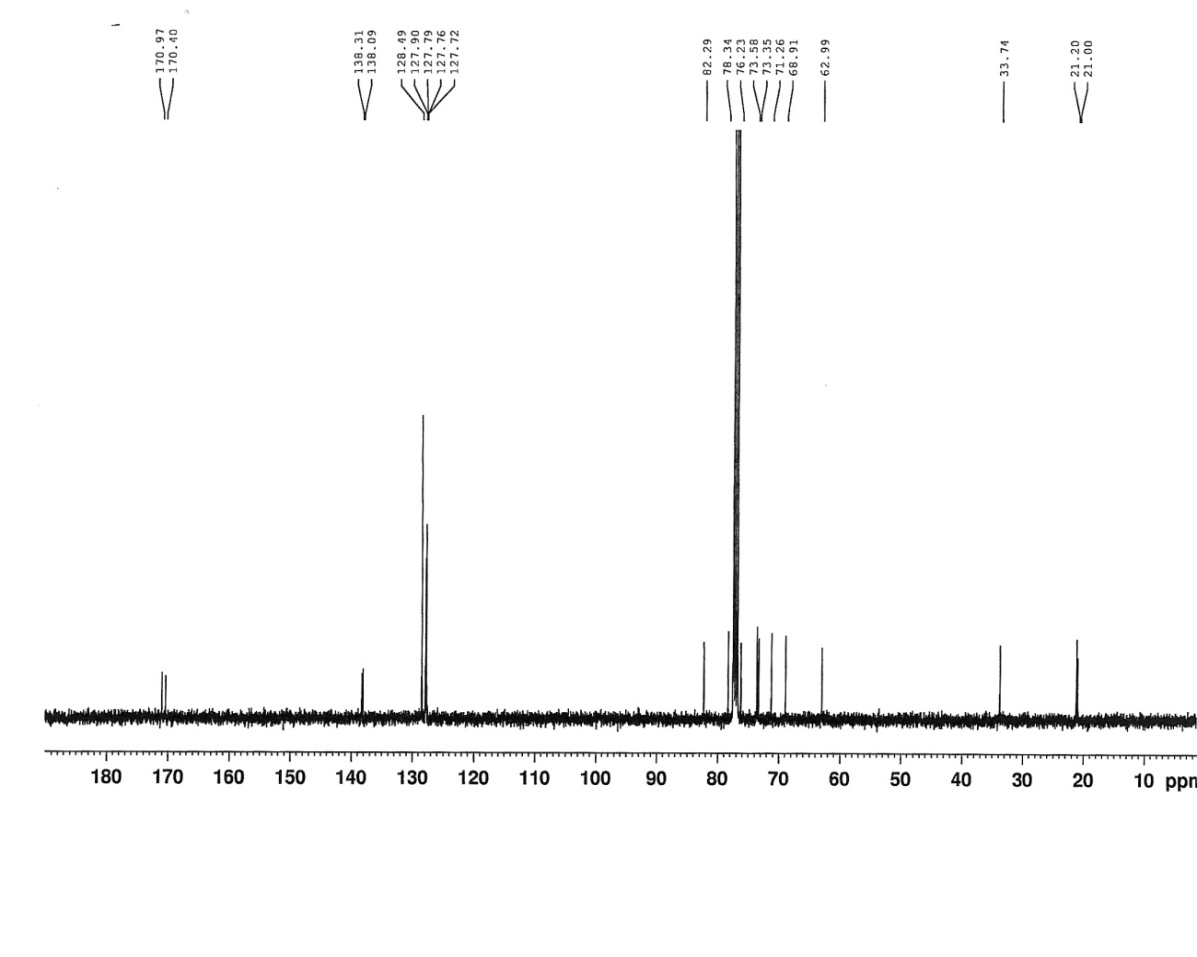


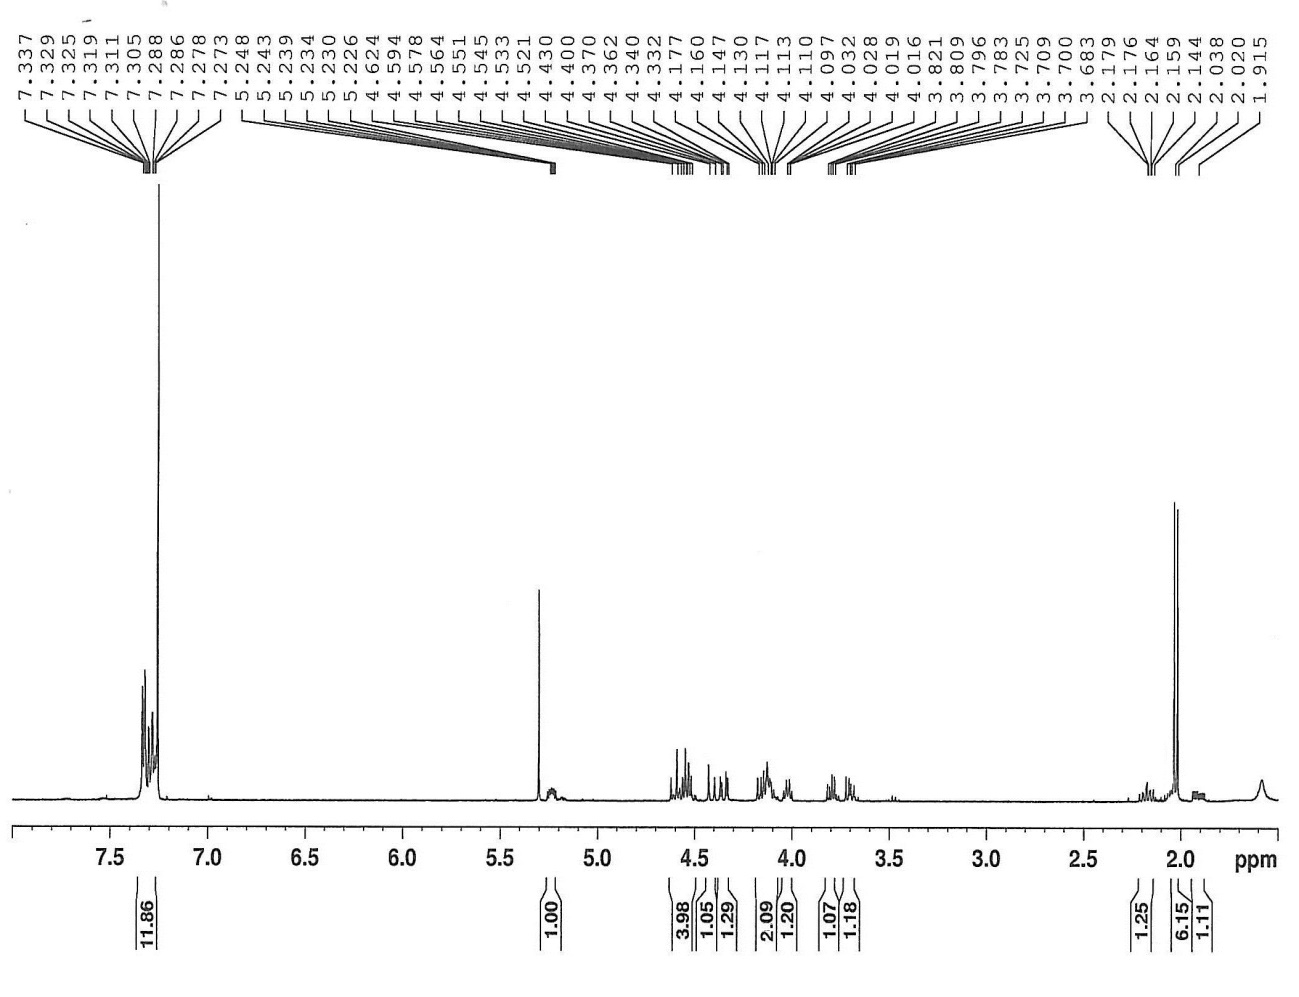


**10b**


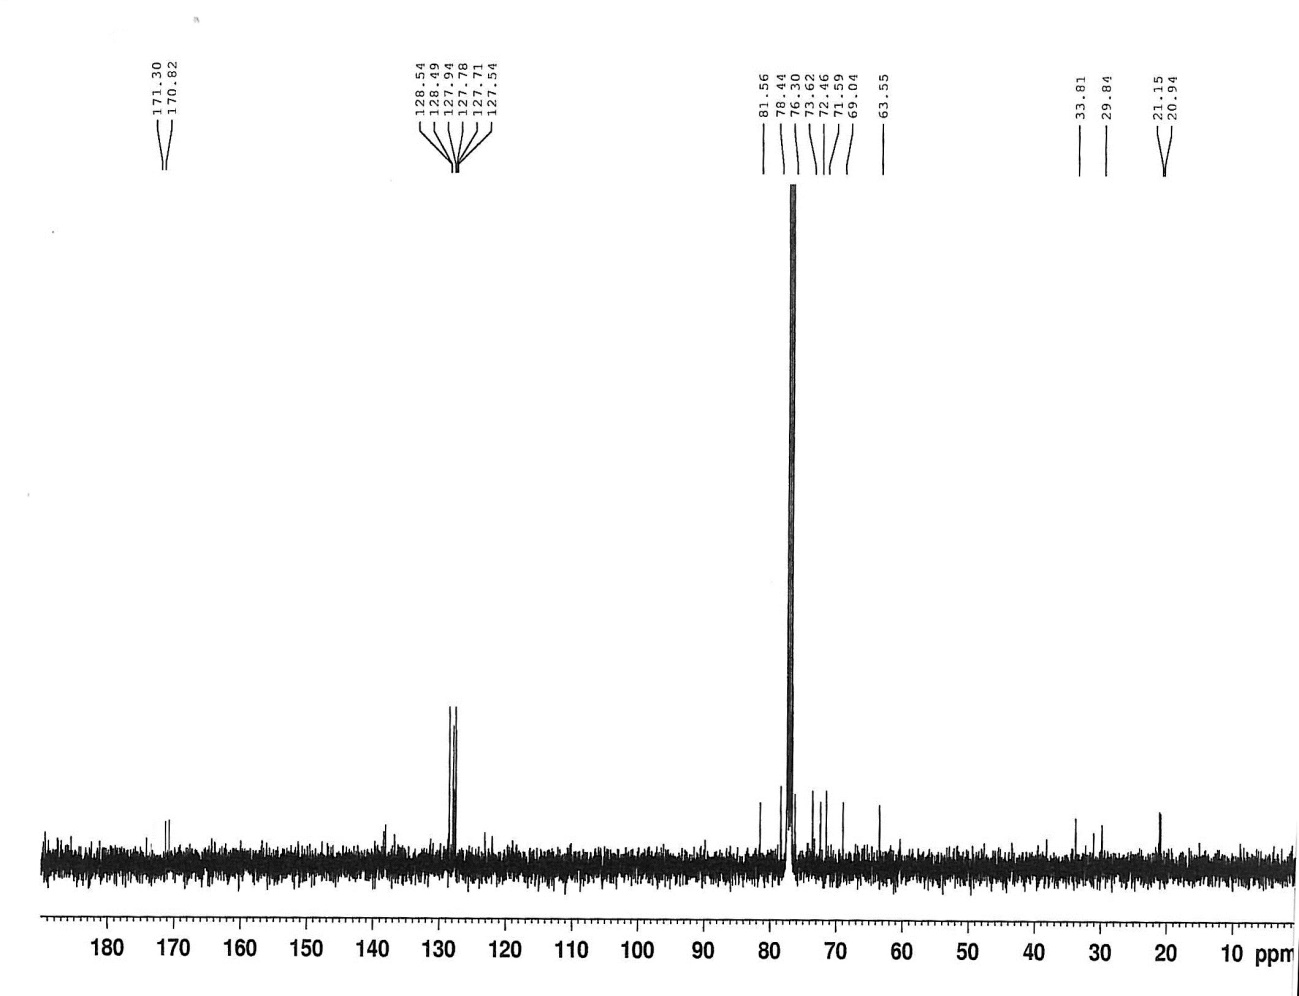


Compound **12a** major diastereoisomer


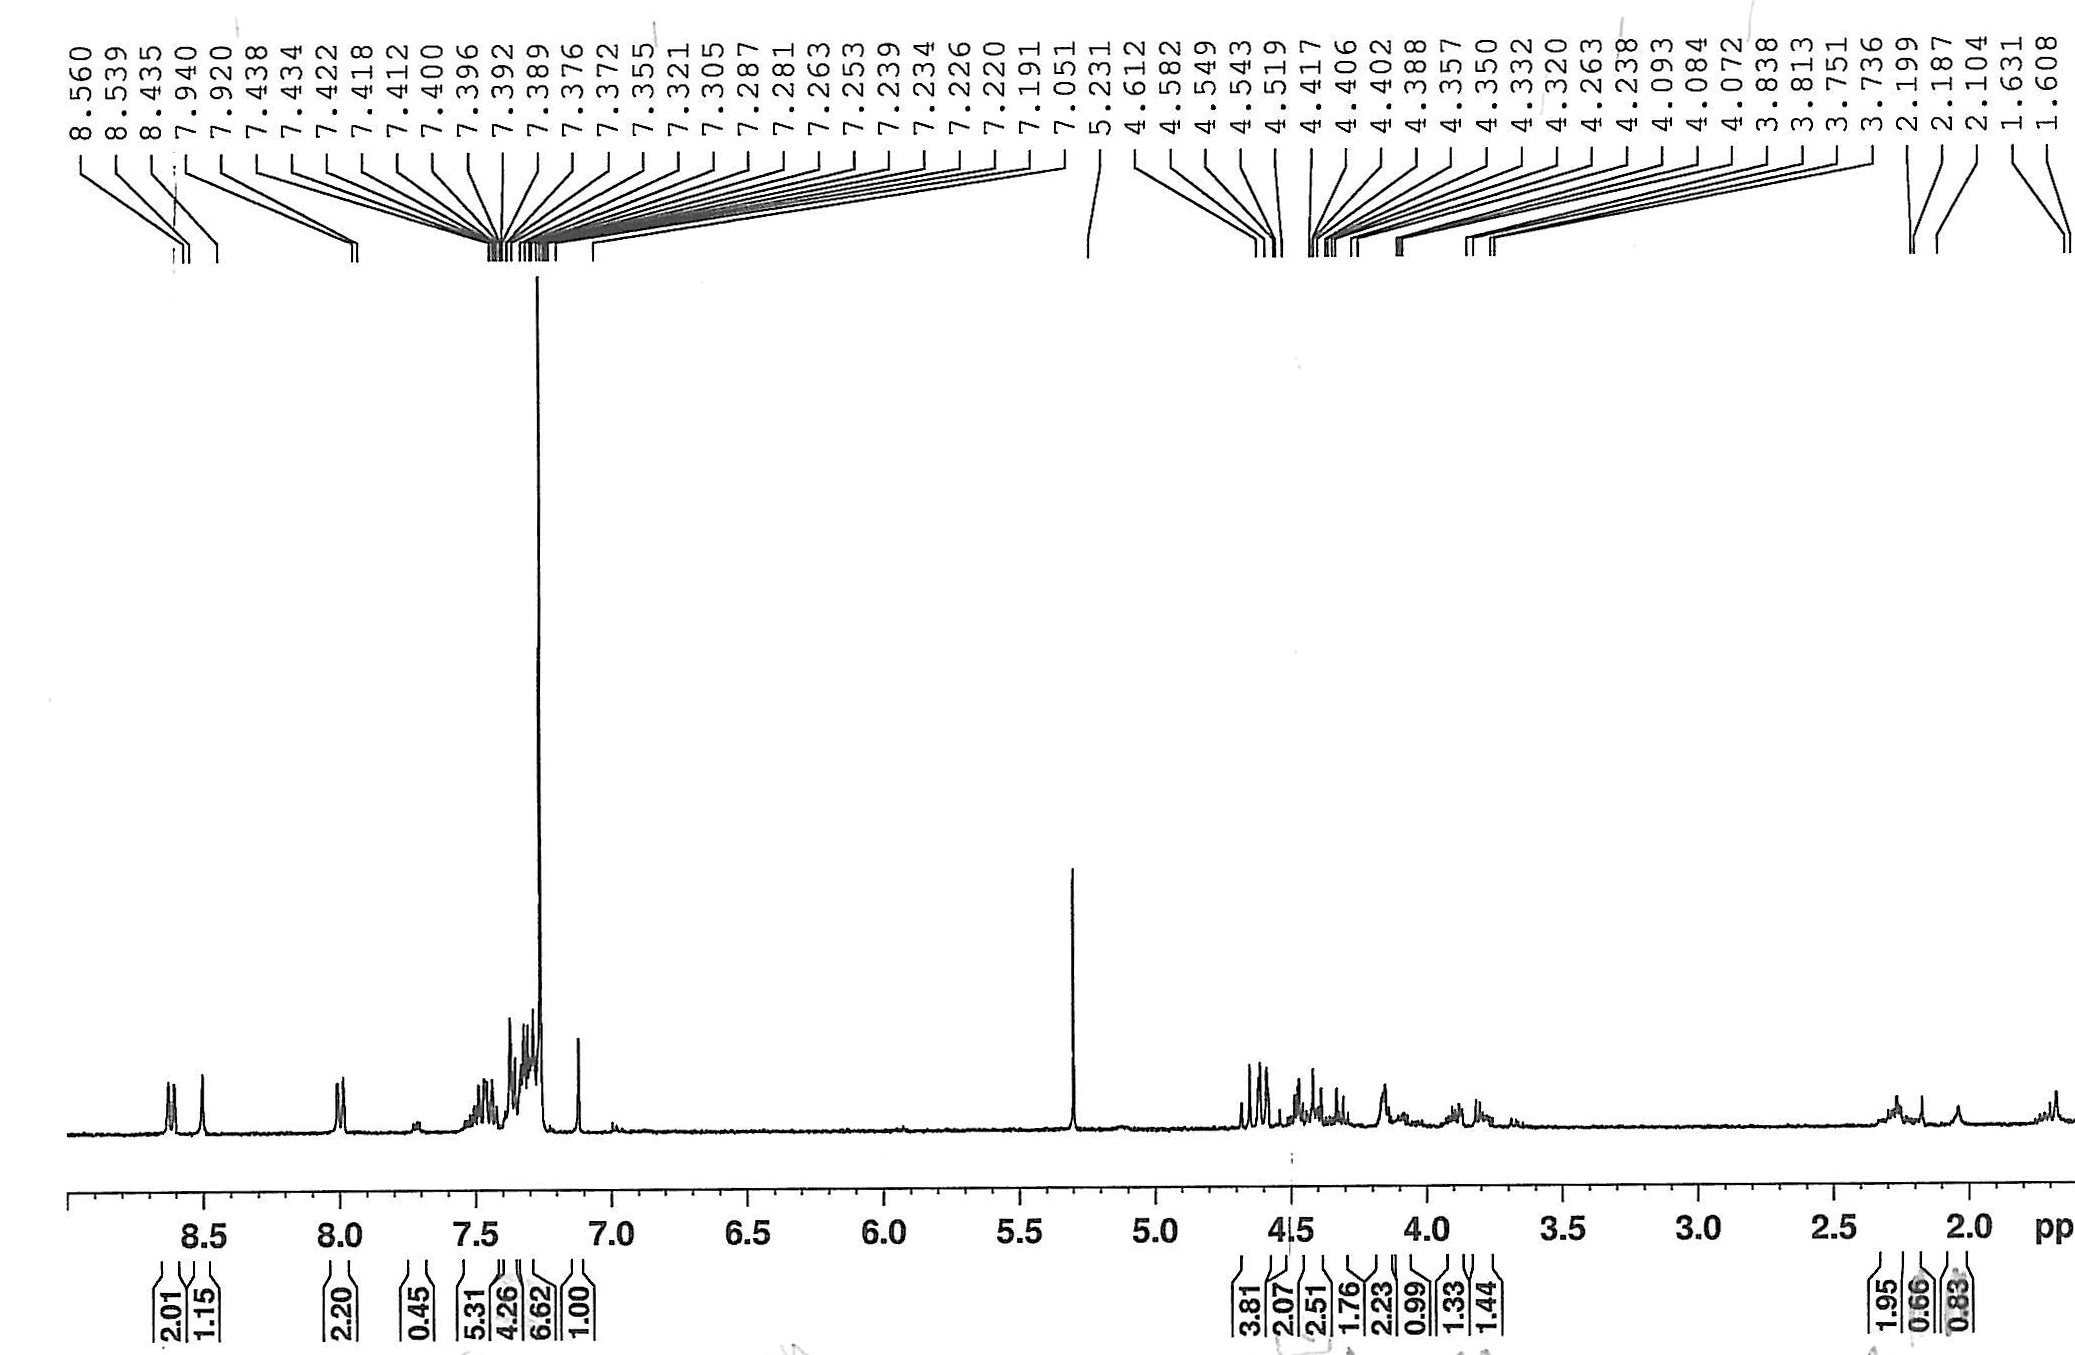


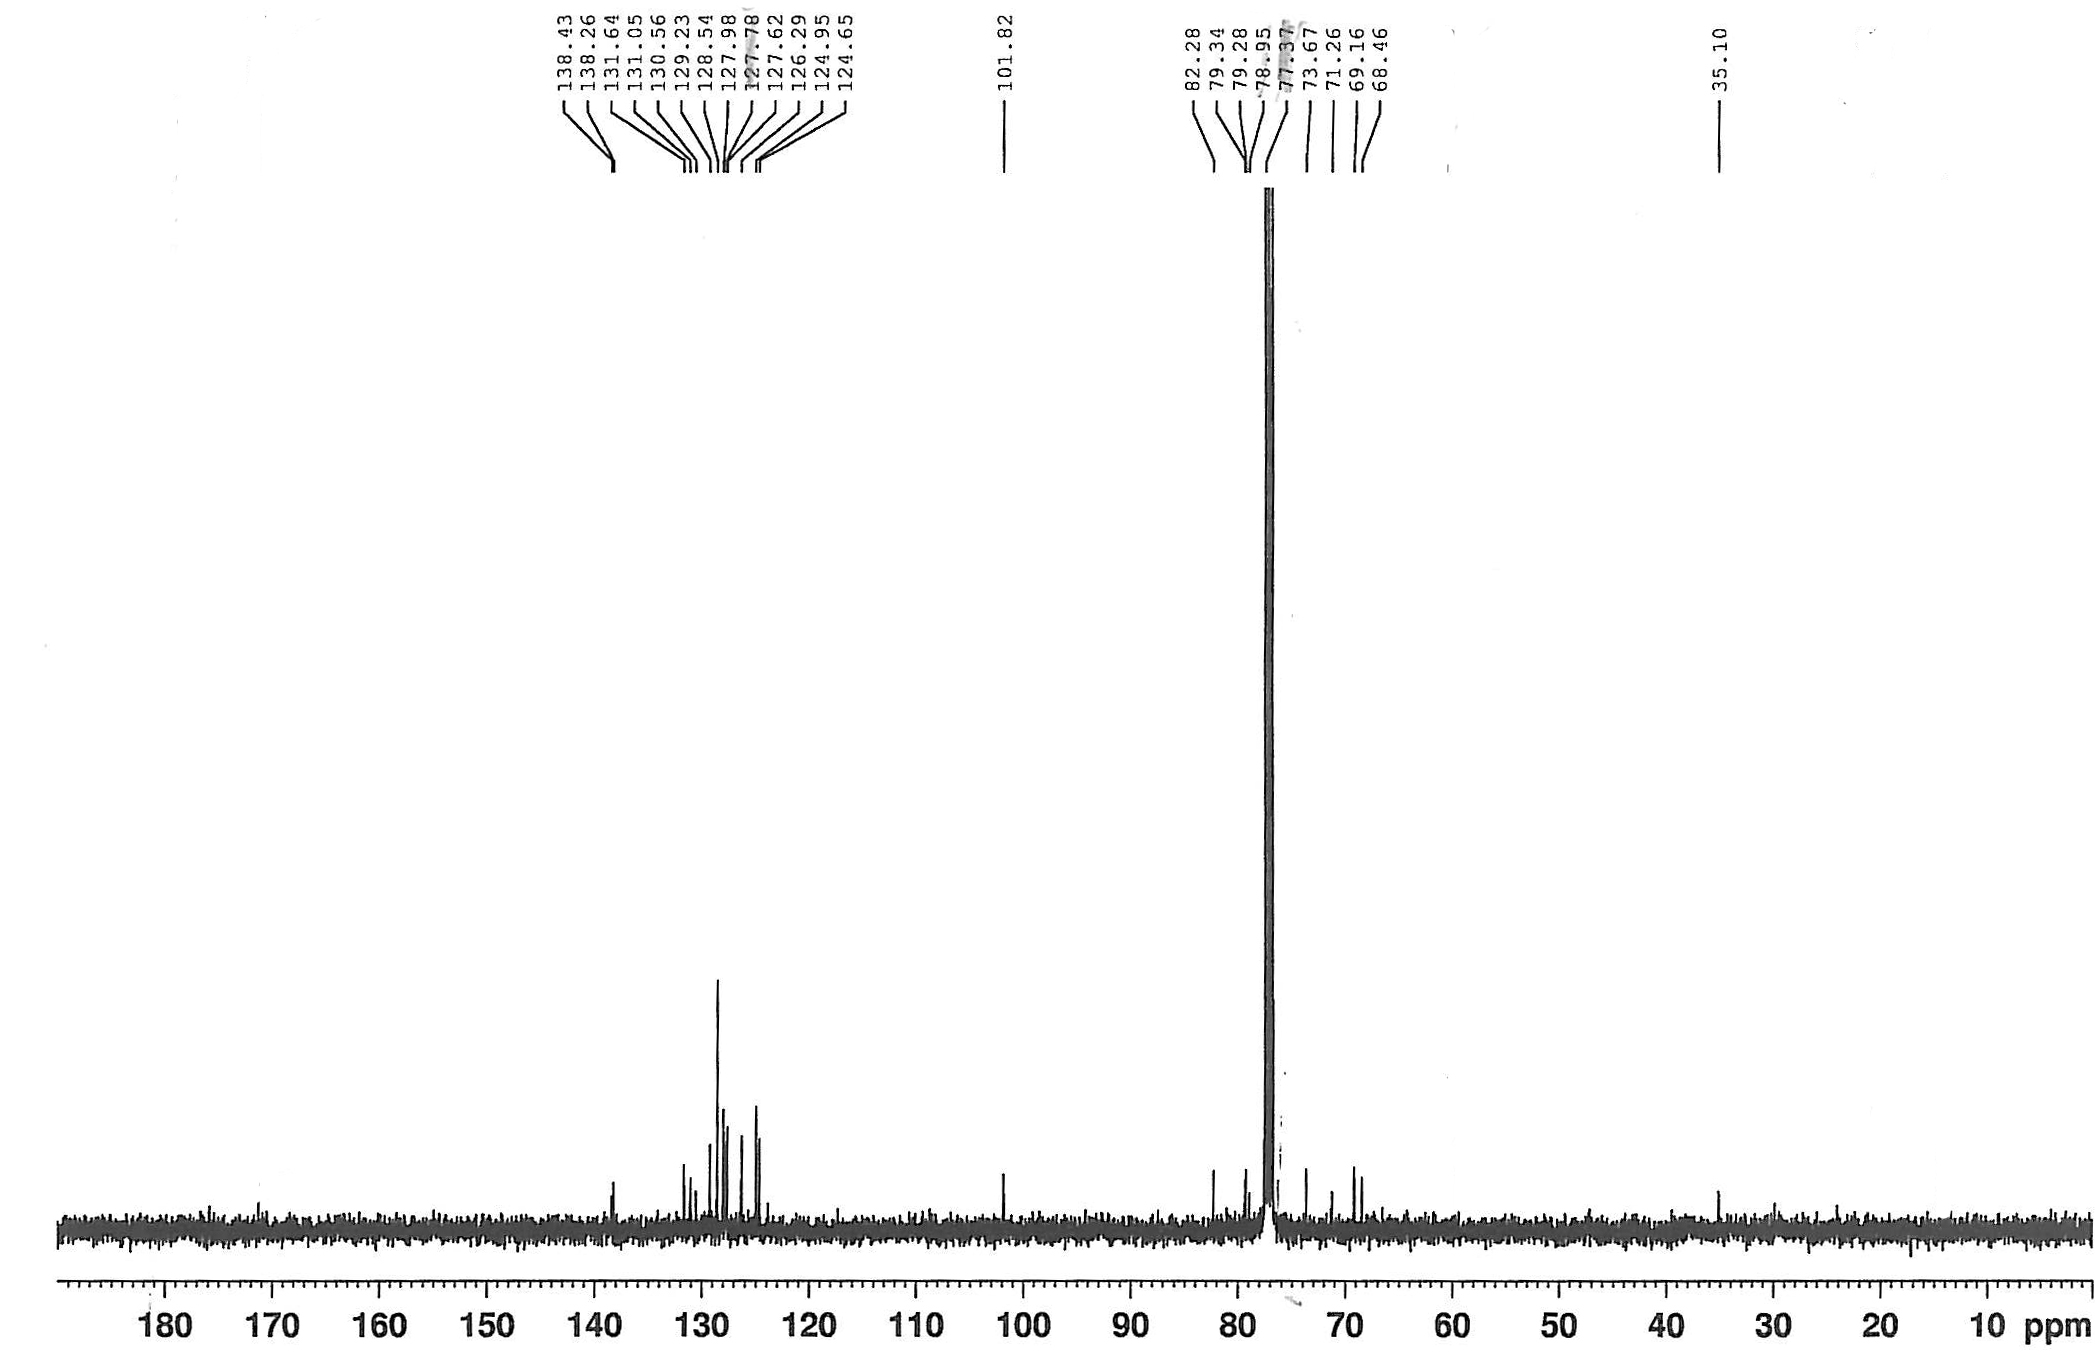


Compound **12b** minor diastereoisomer


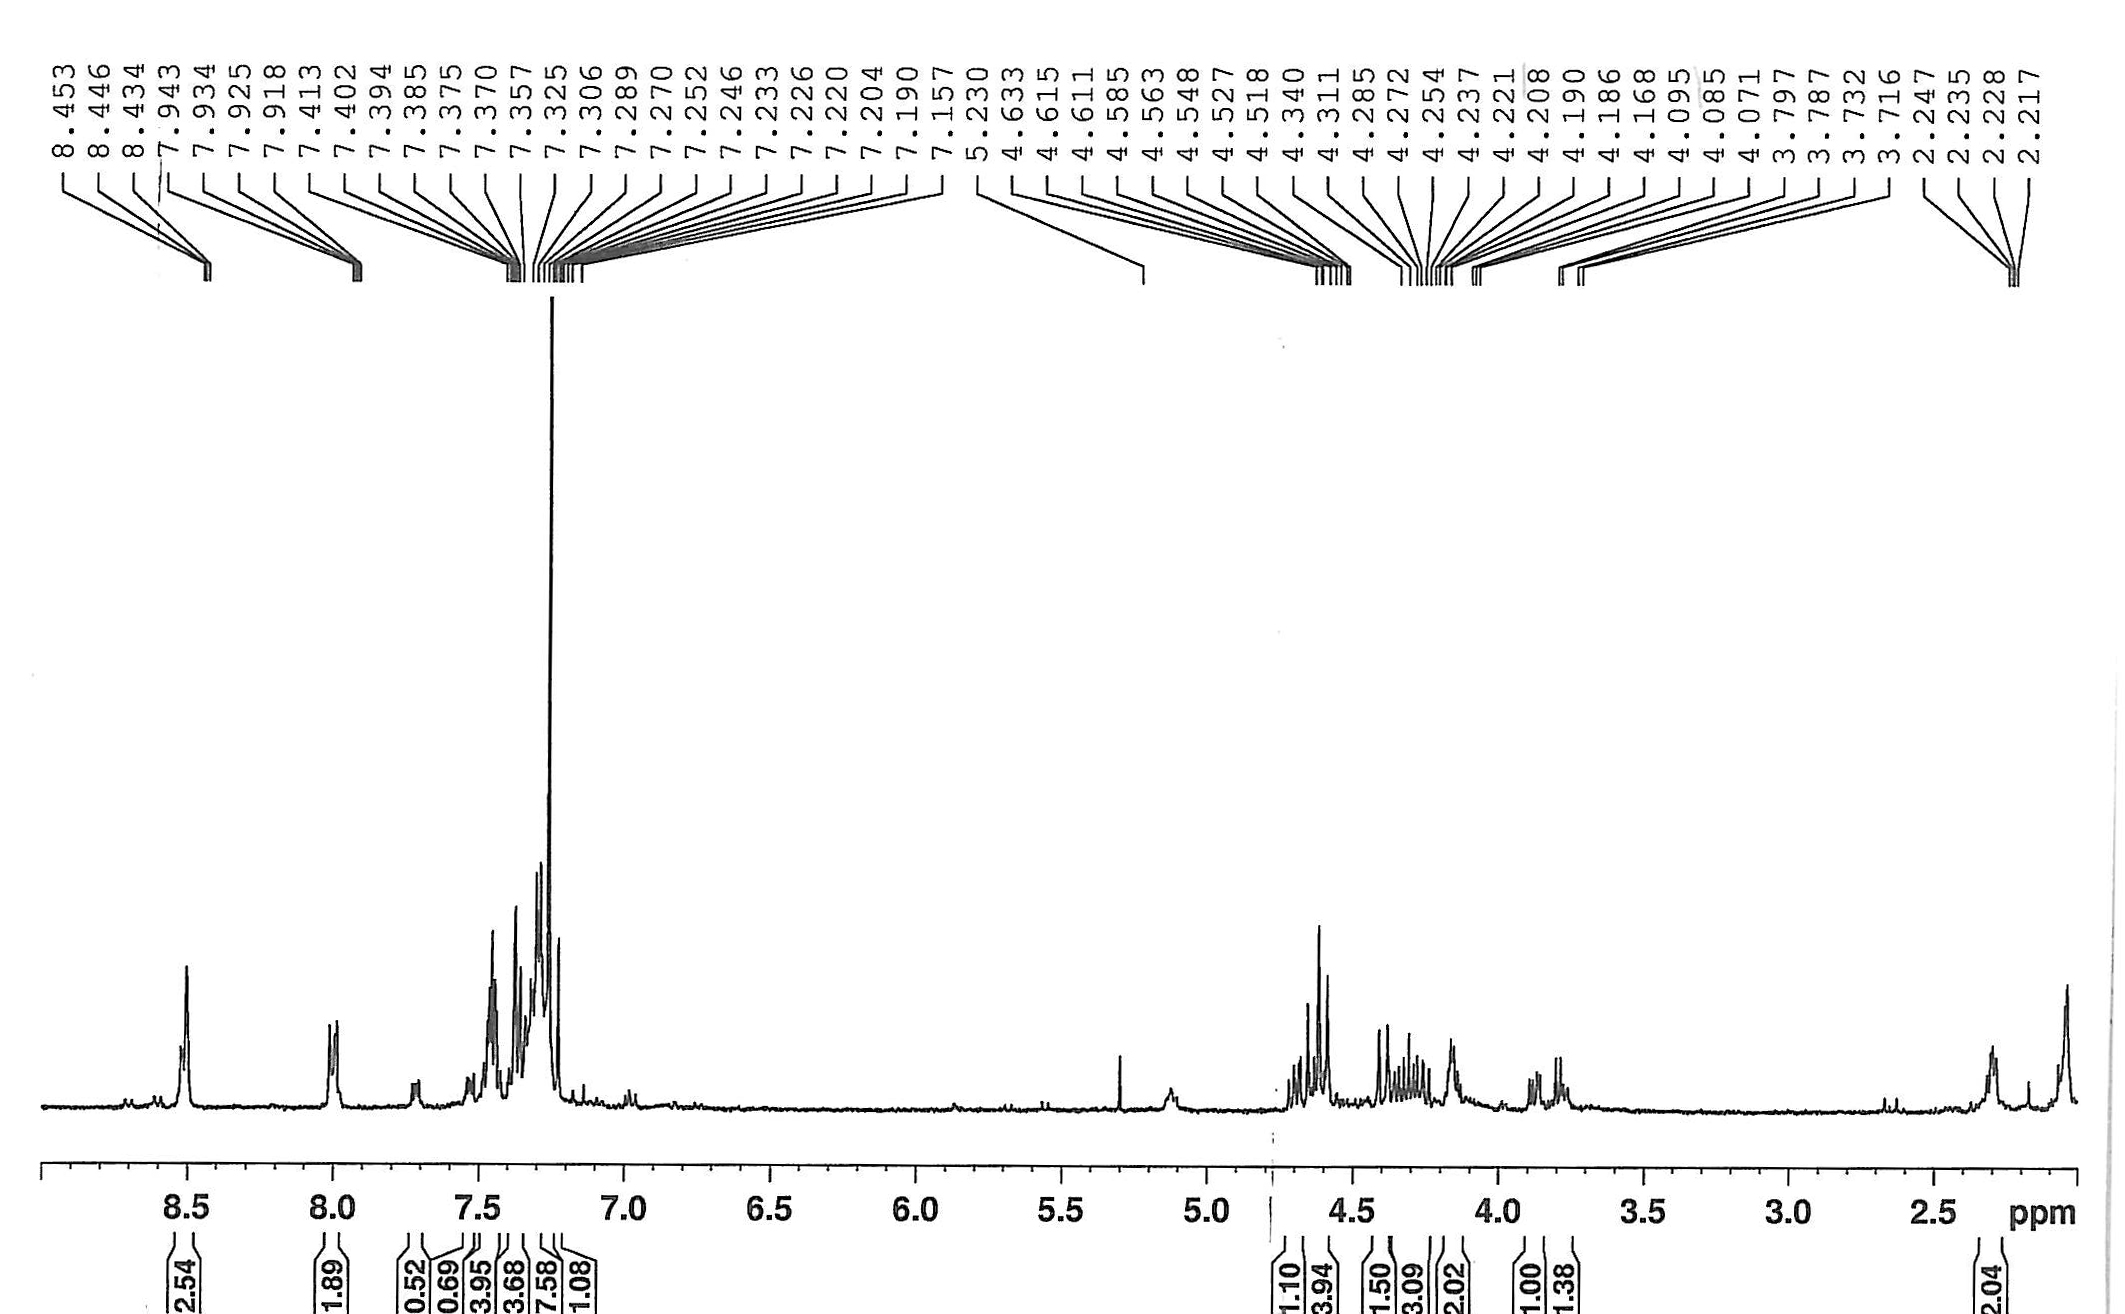


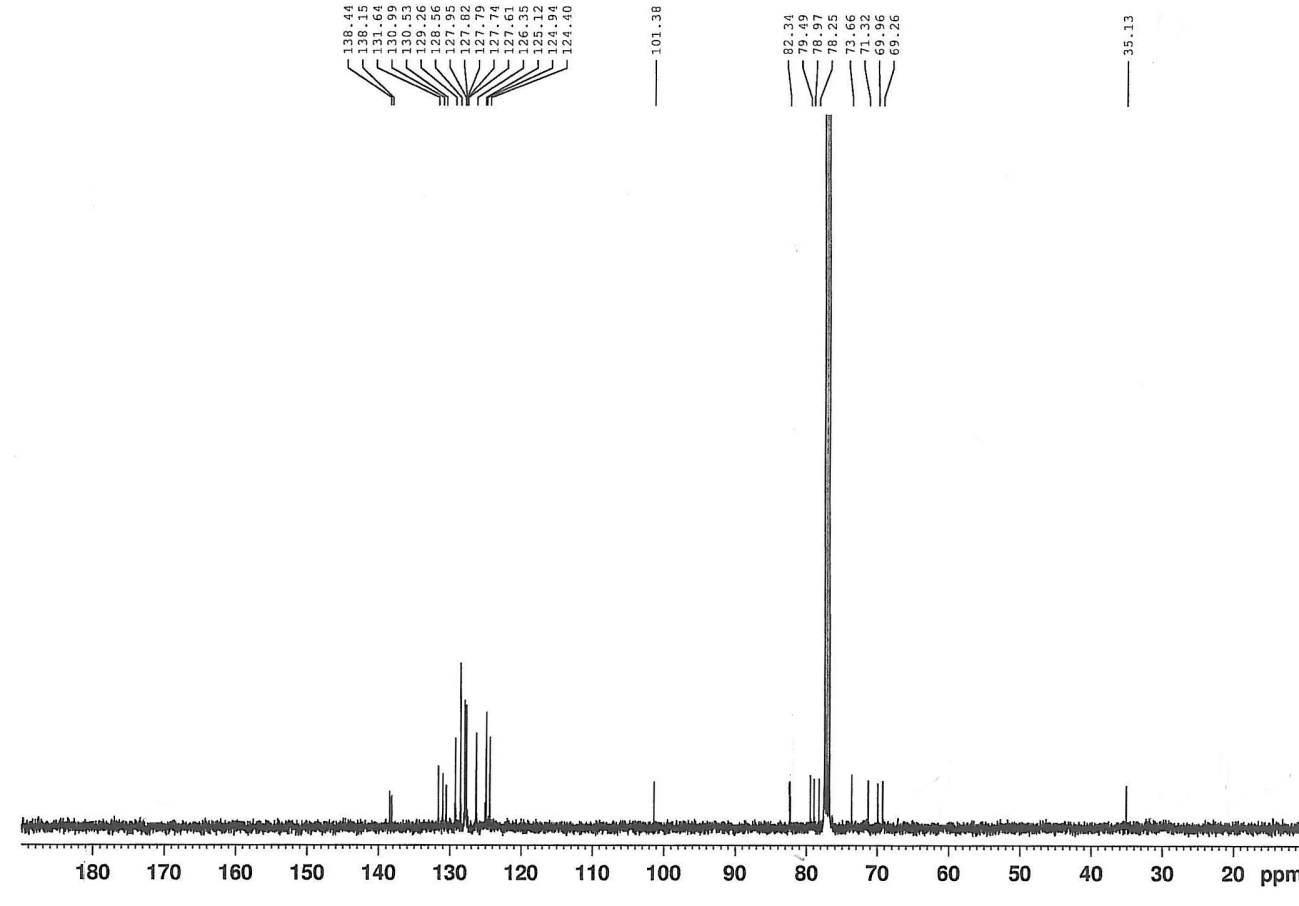


Compound **13**

**
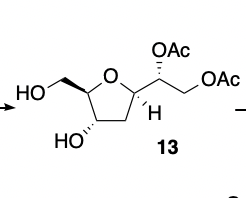
**
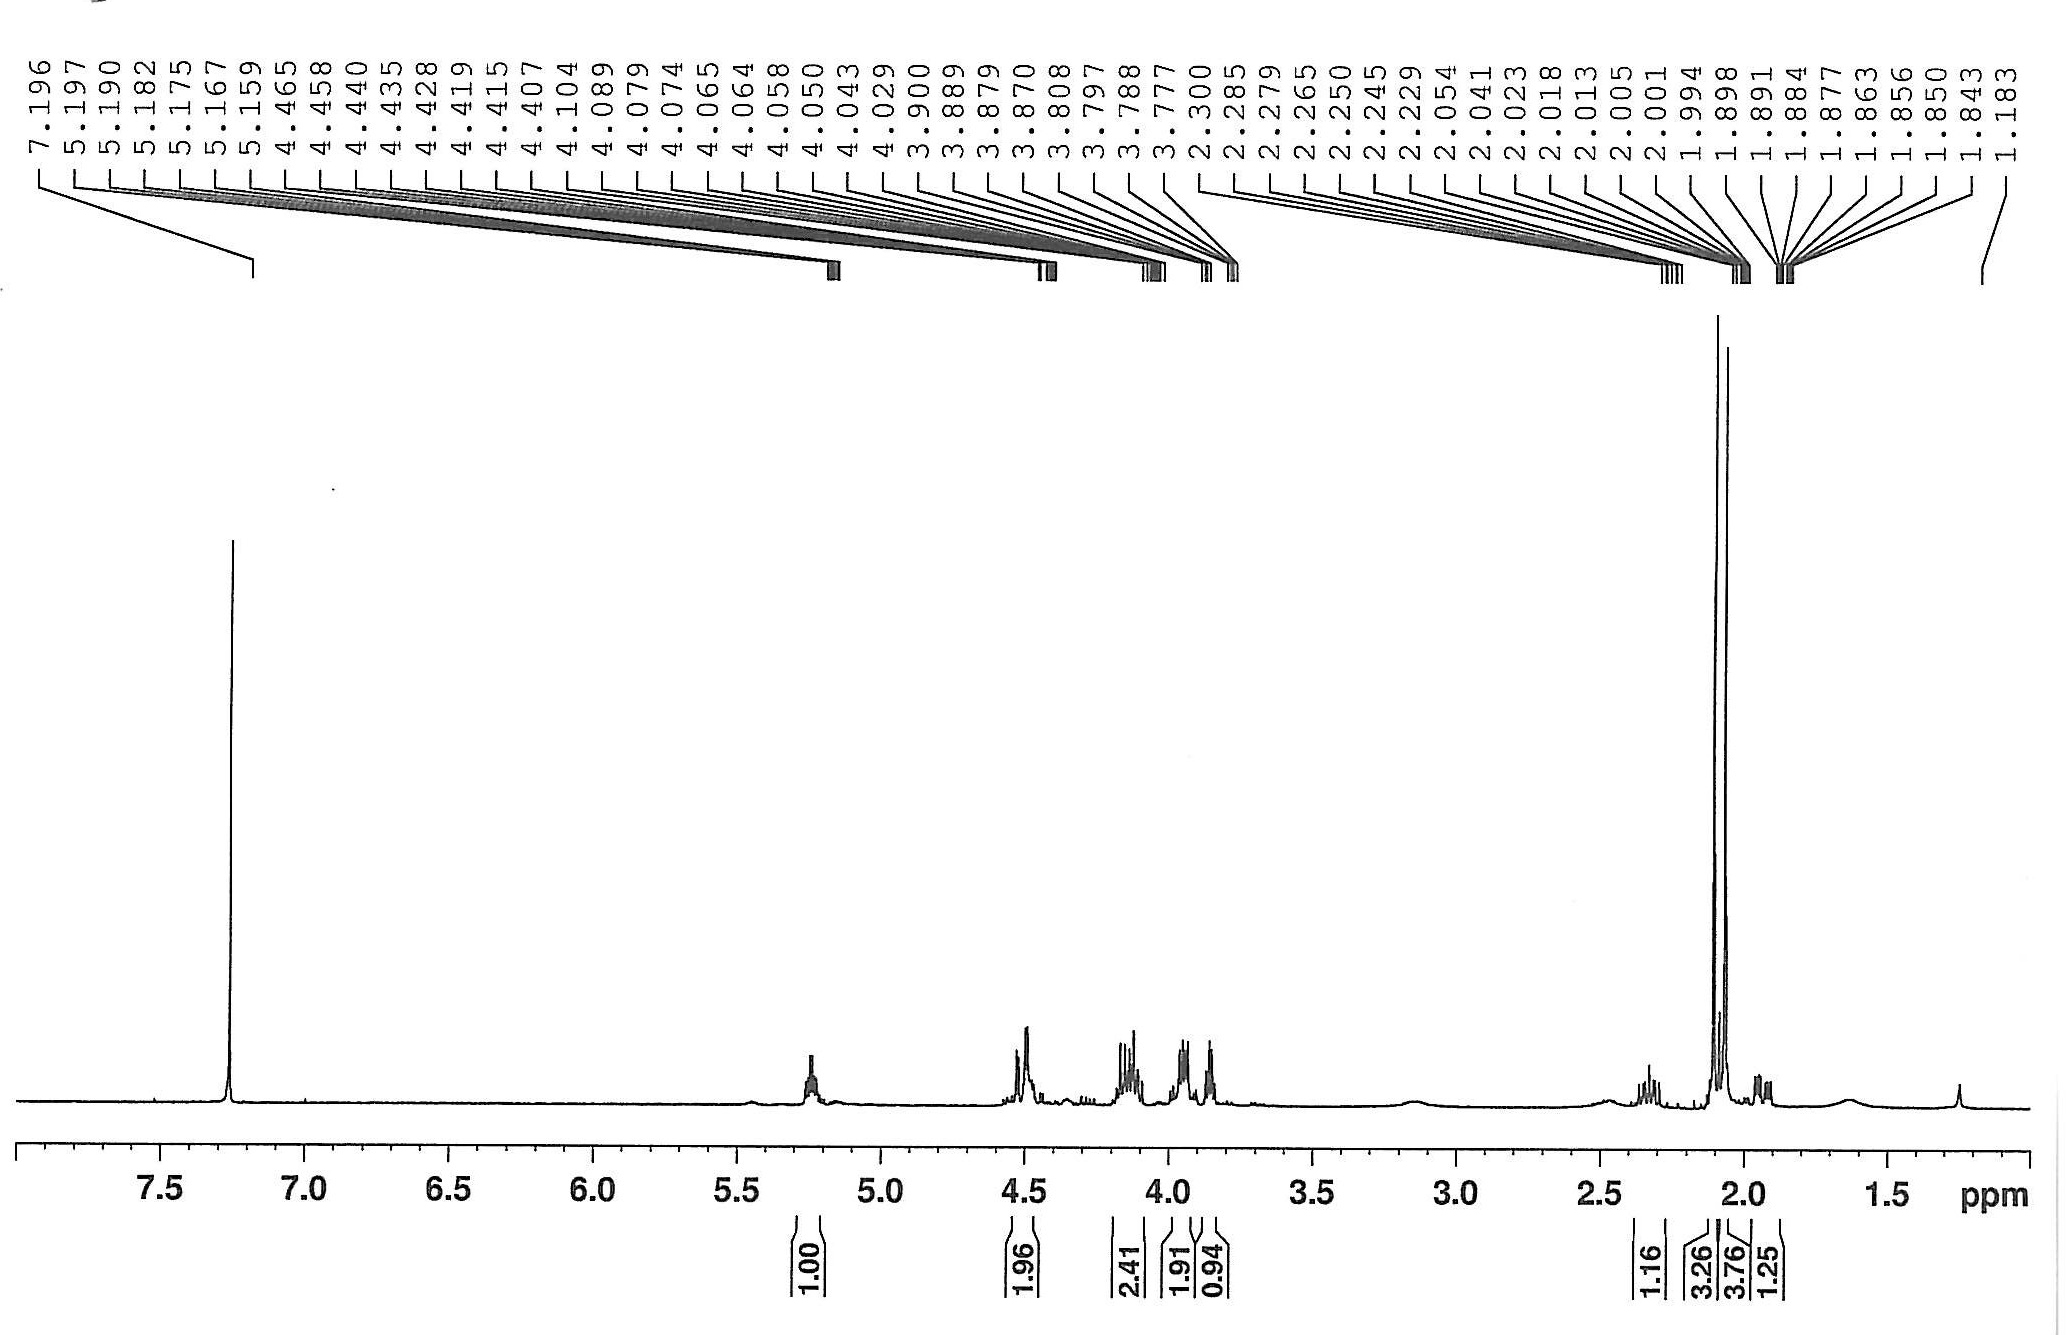


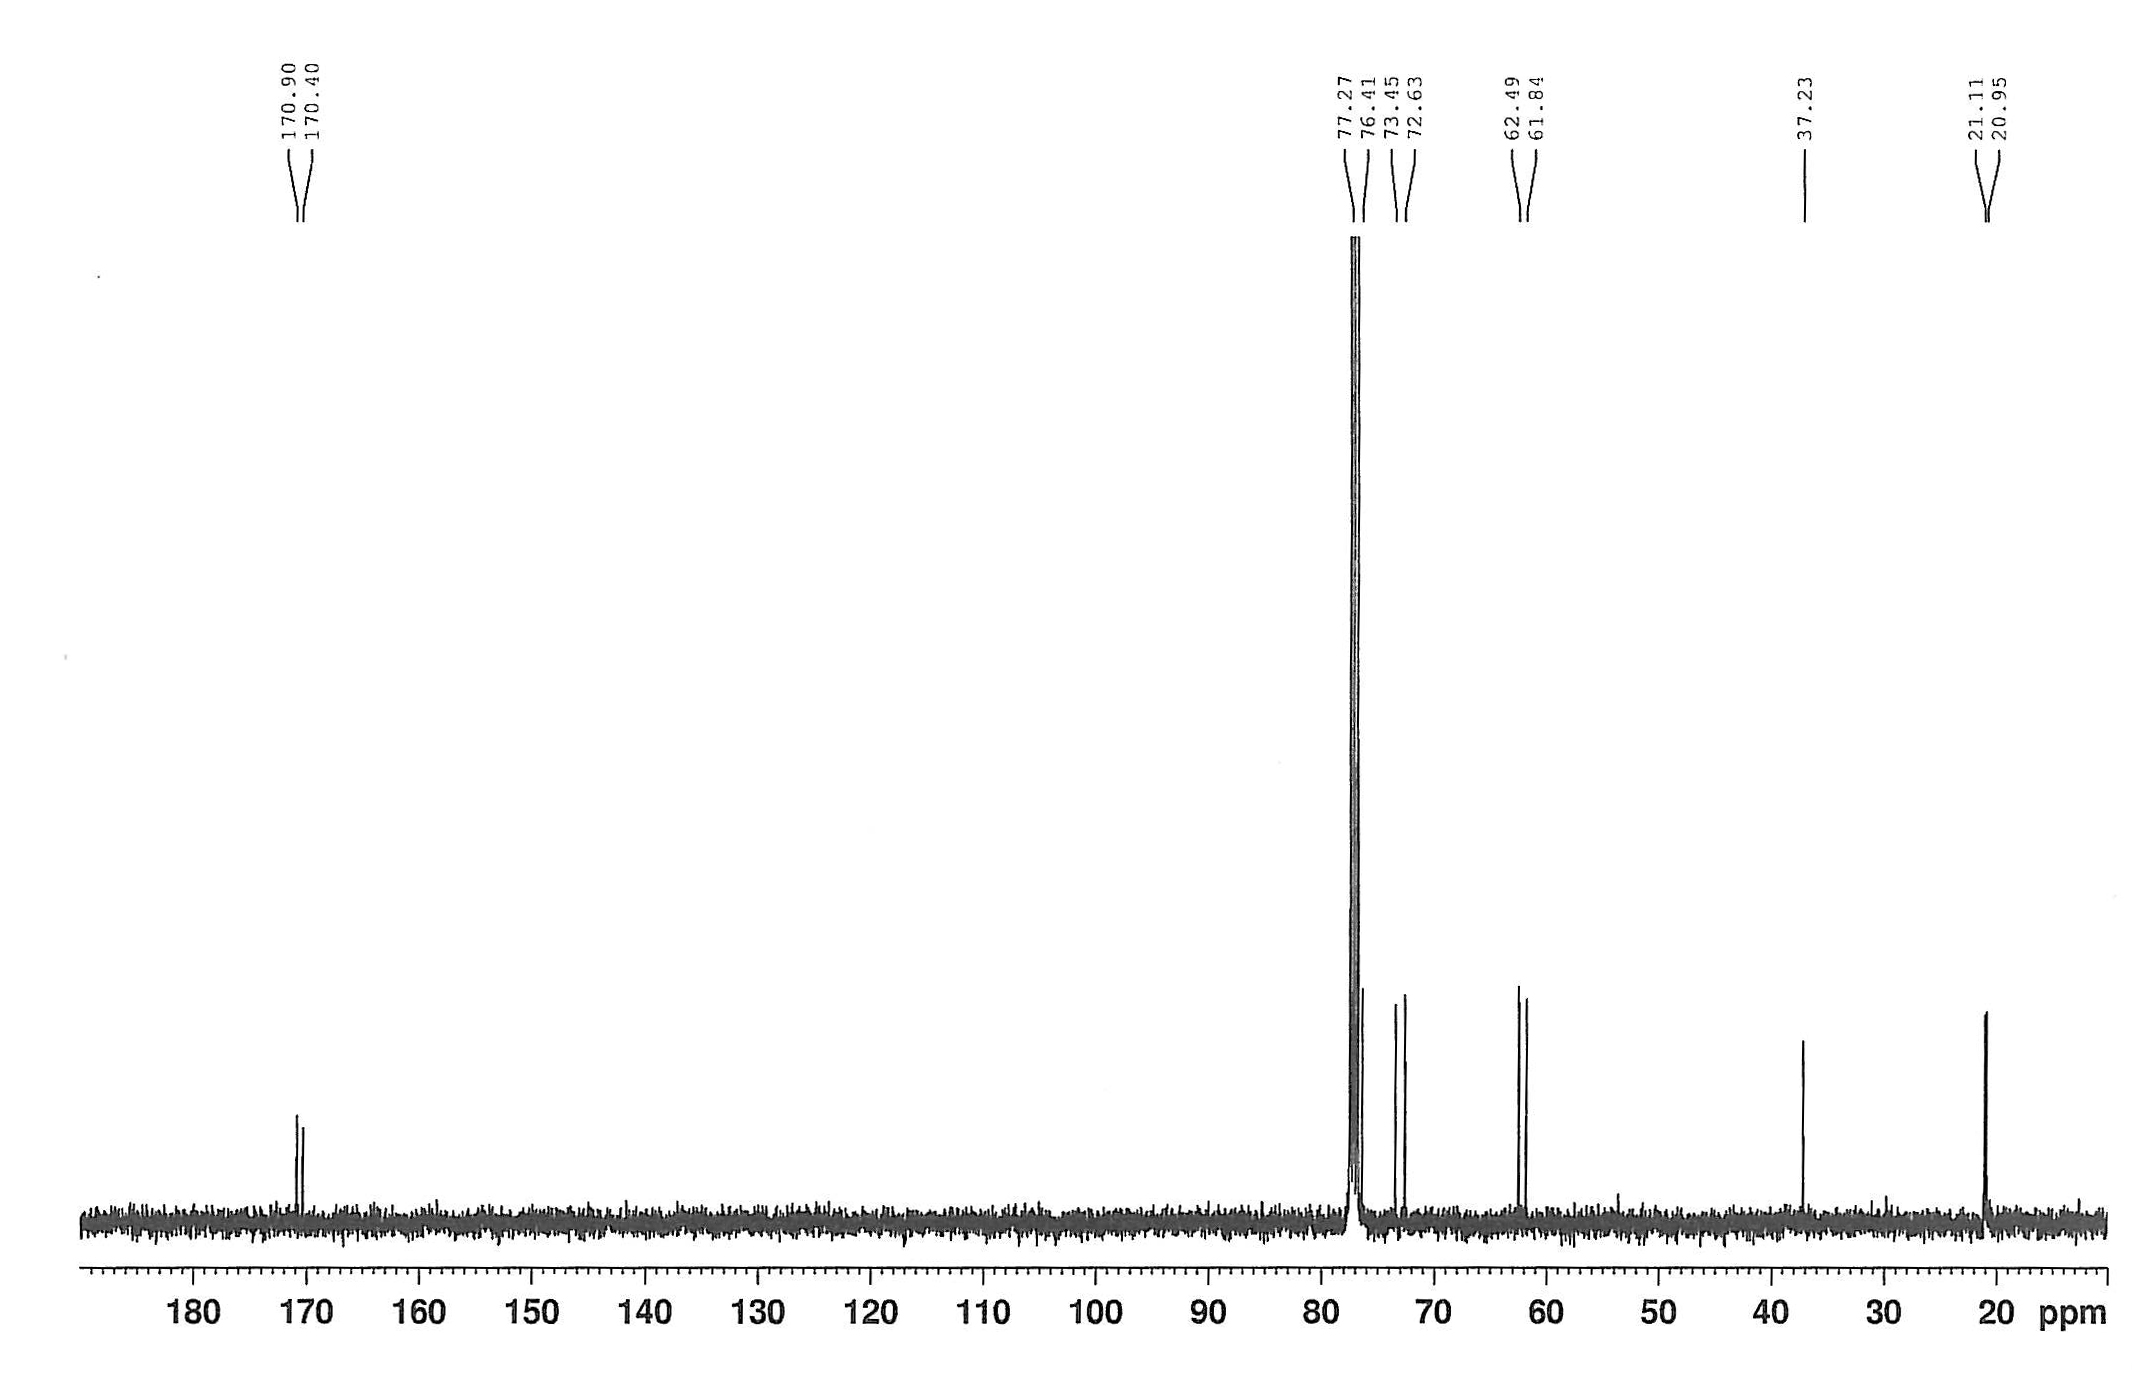


Compound **14**


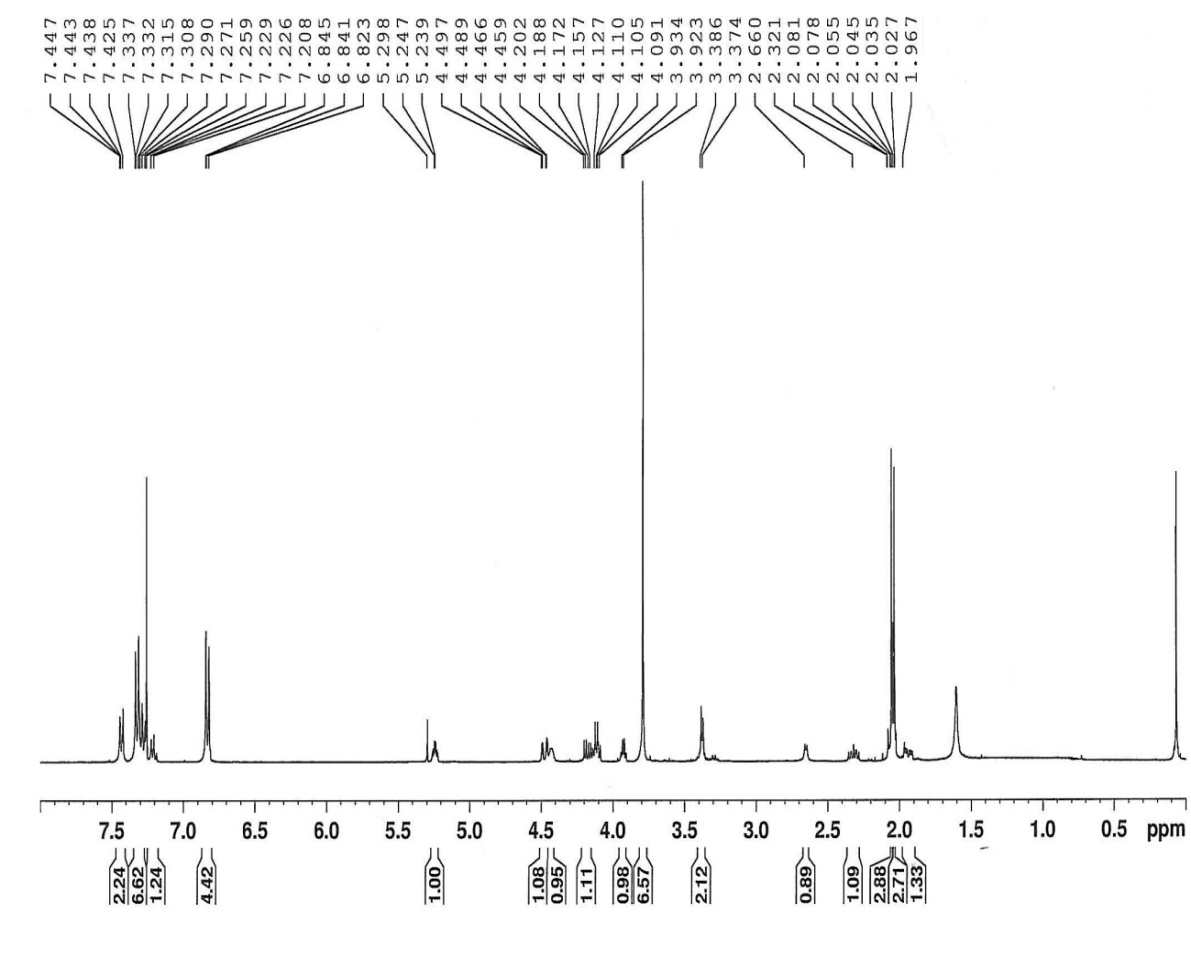


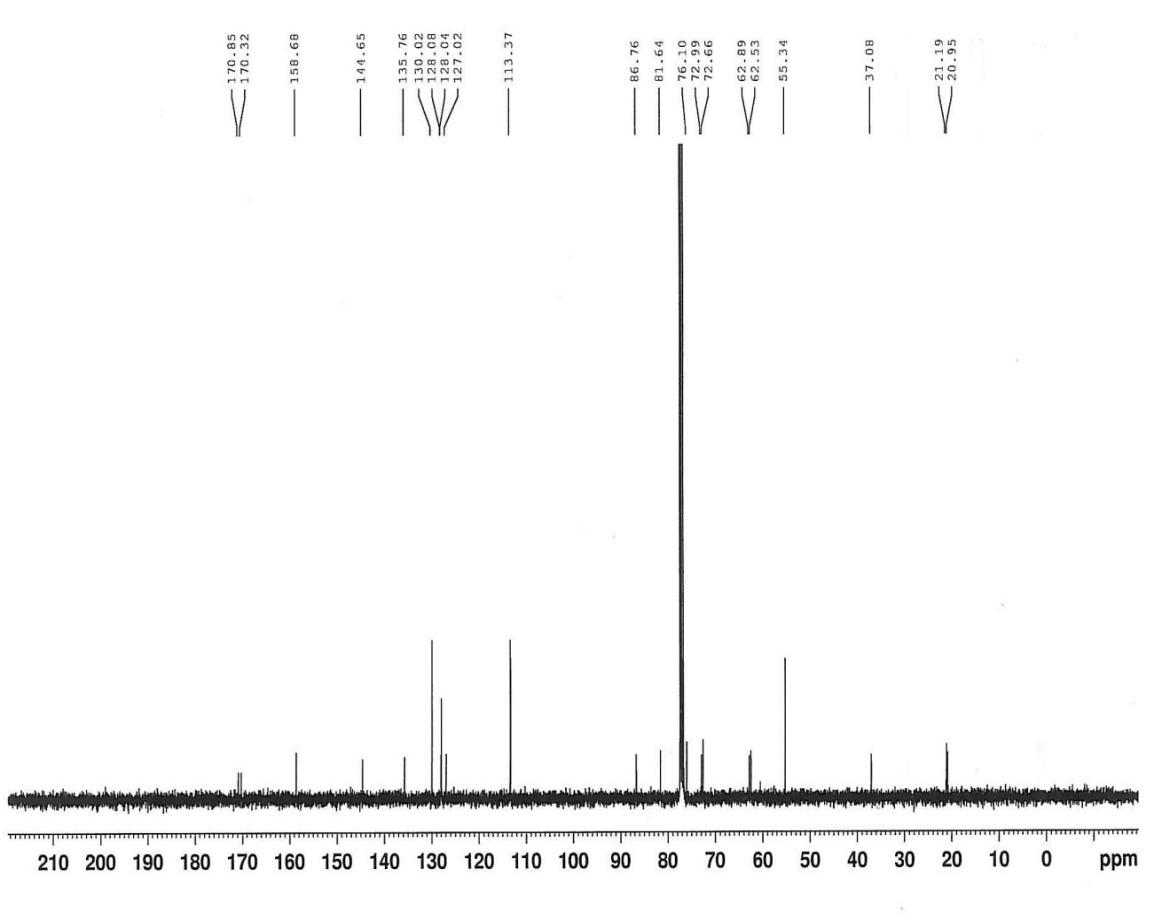


Compound **15**


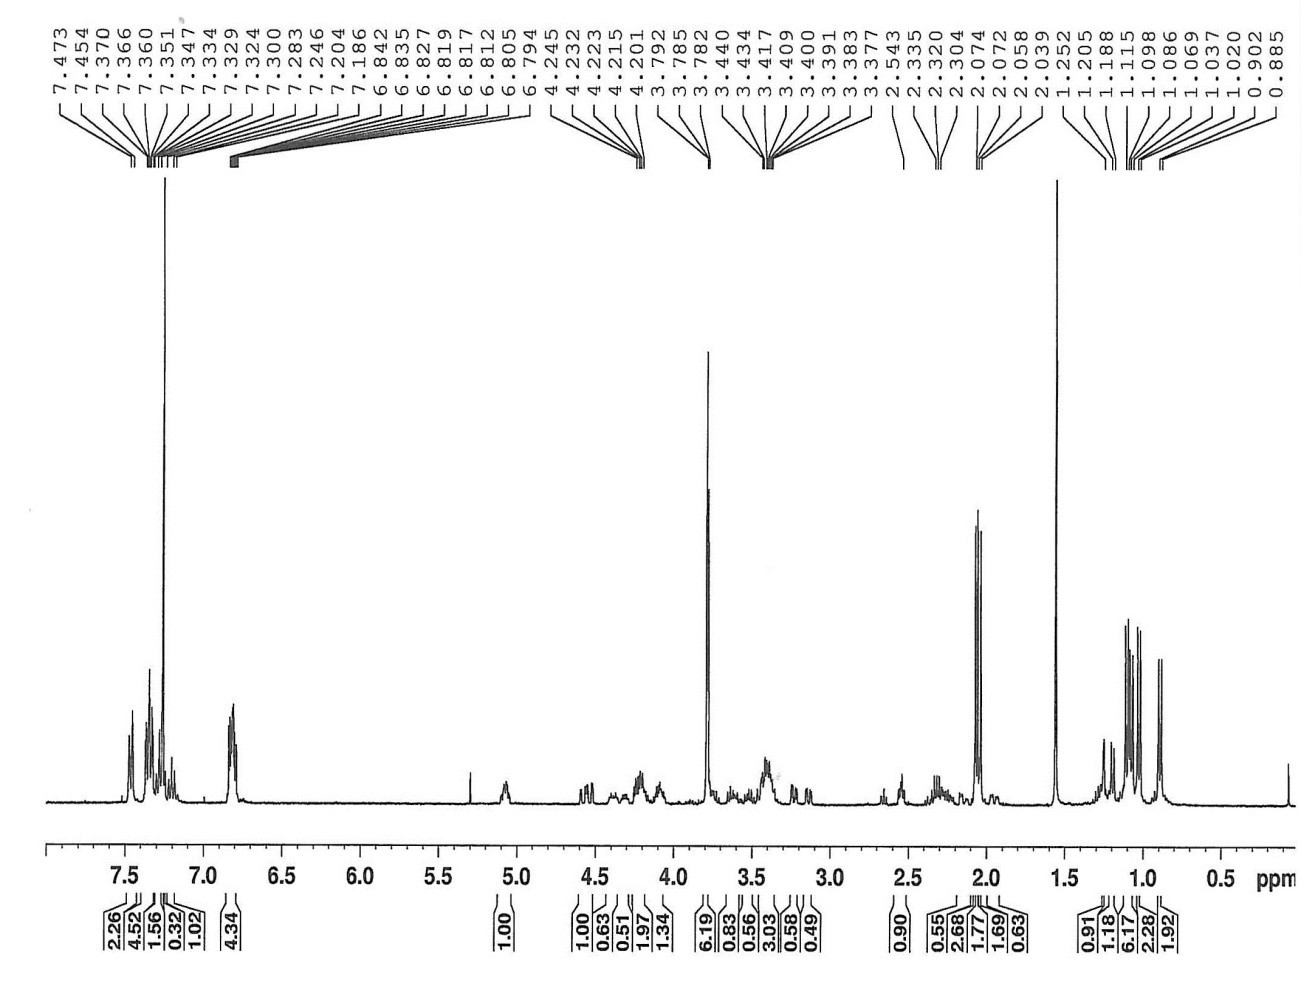


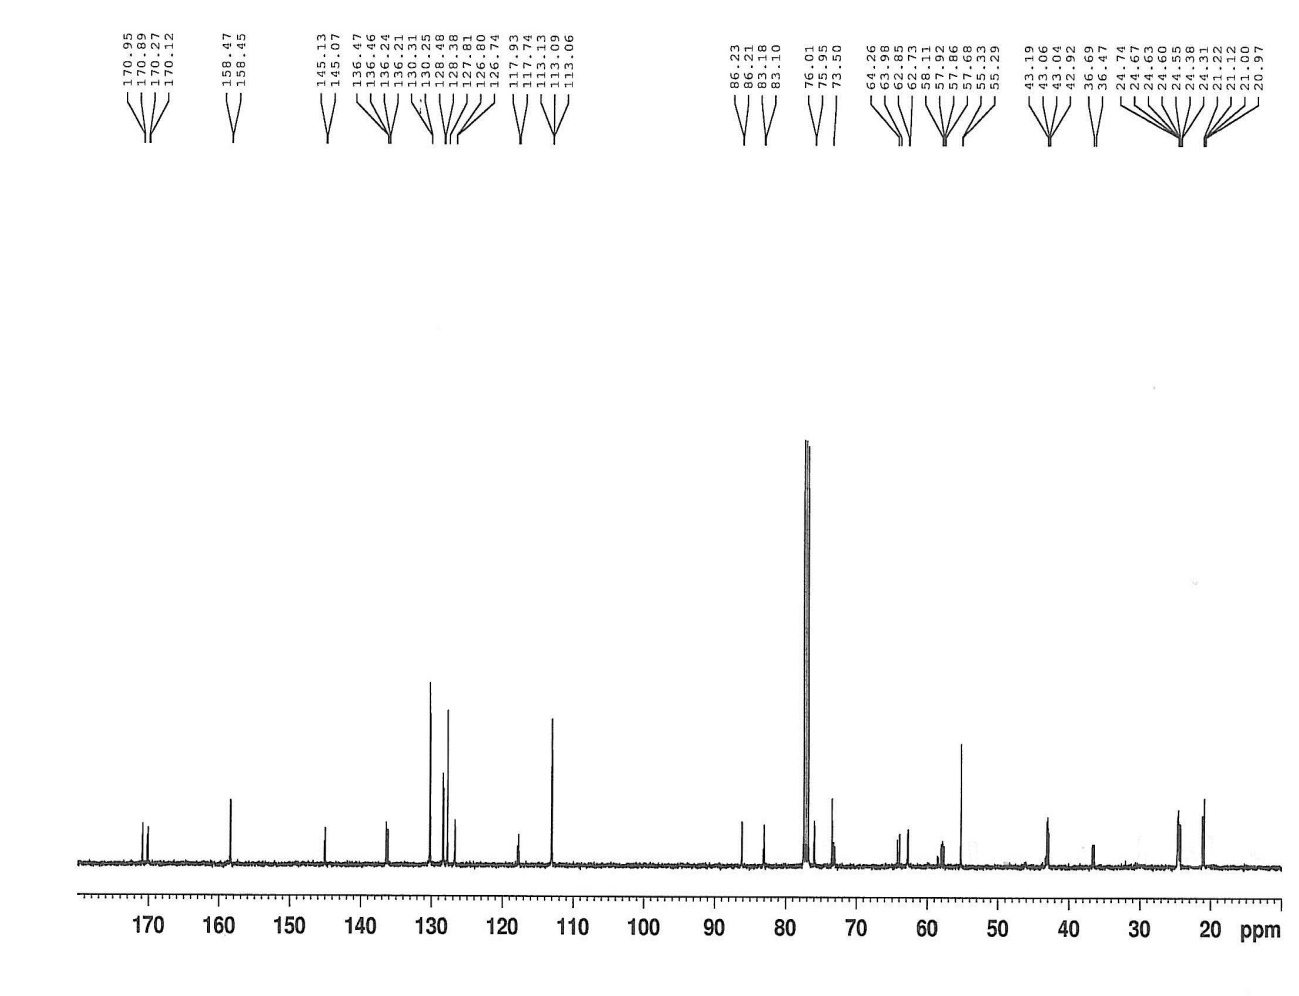


Compound **16**


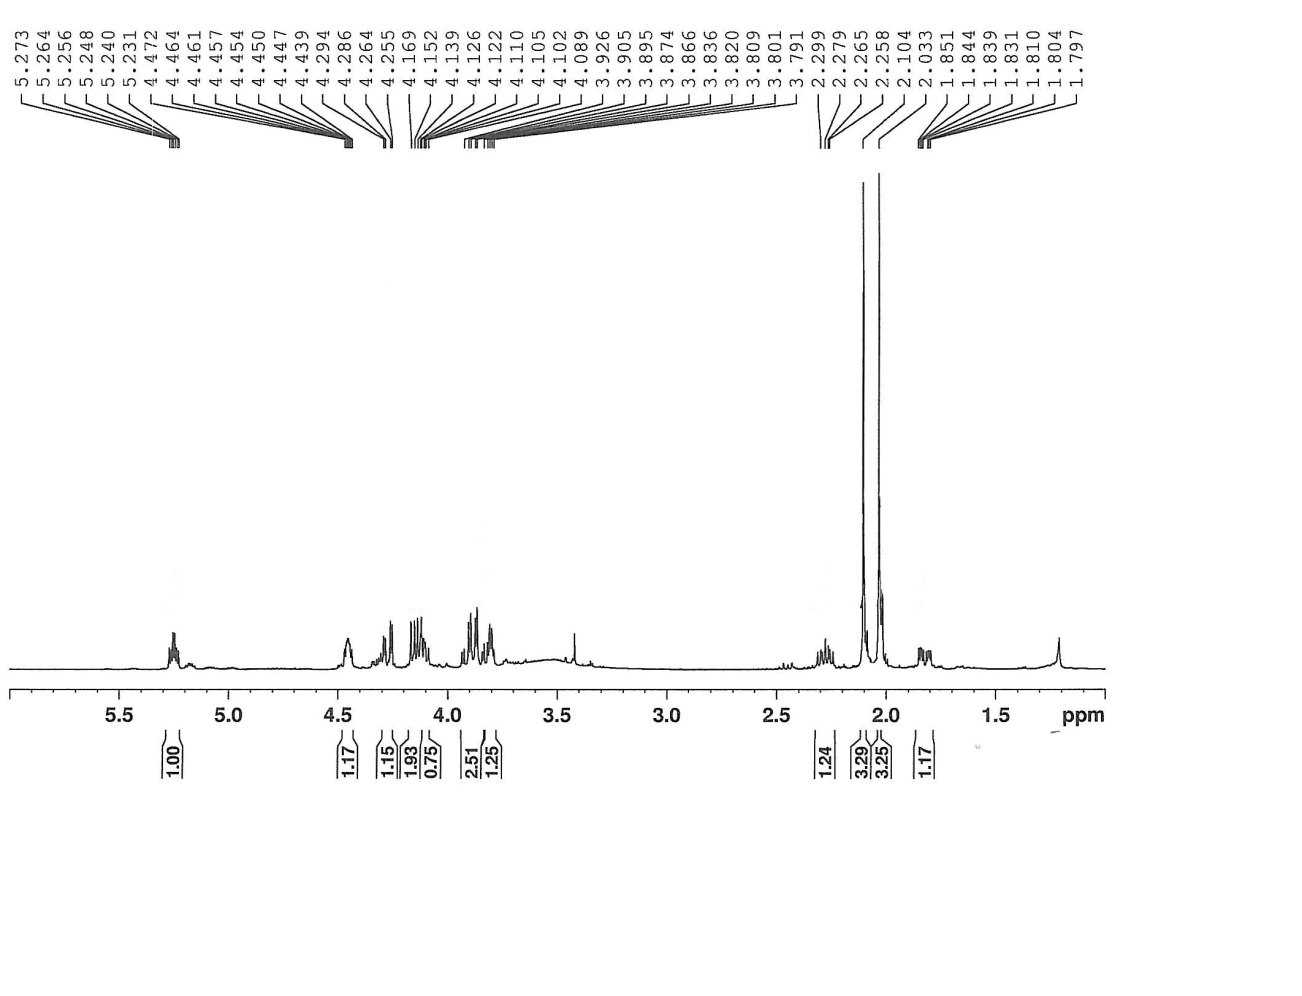

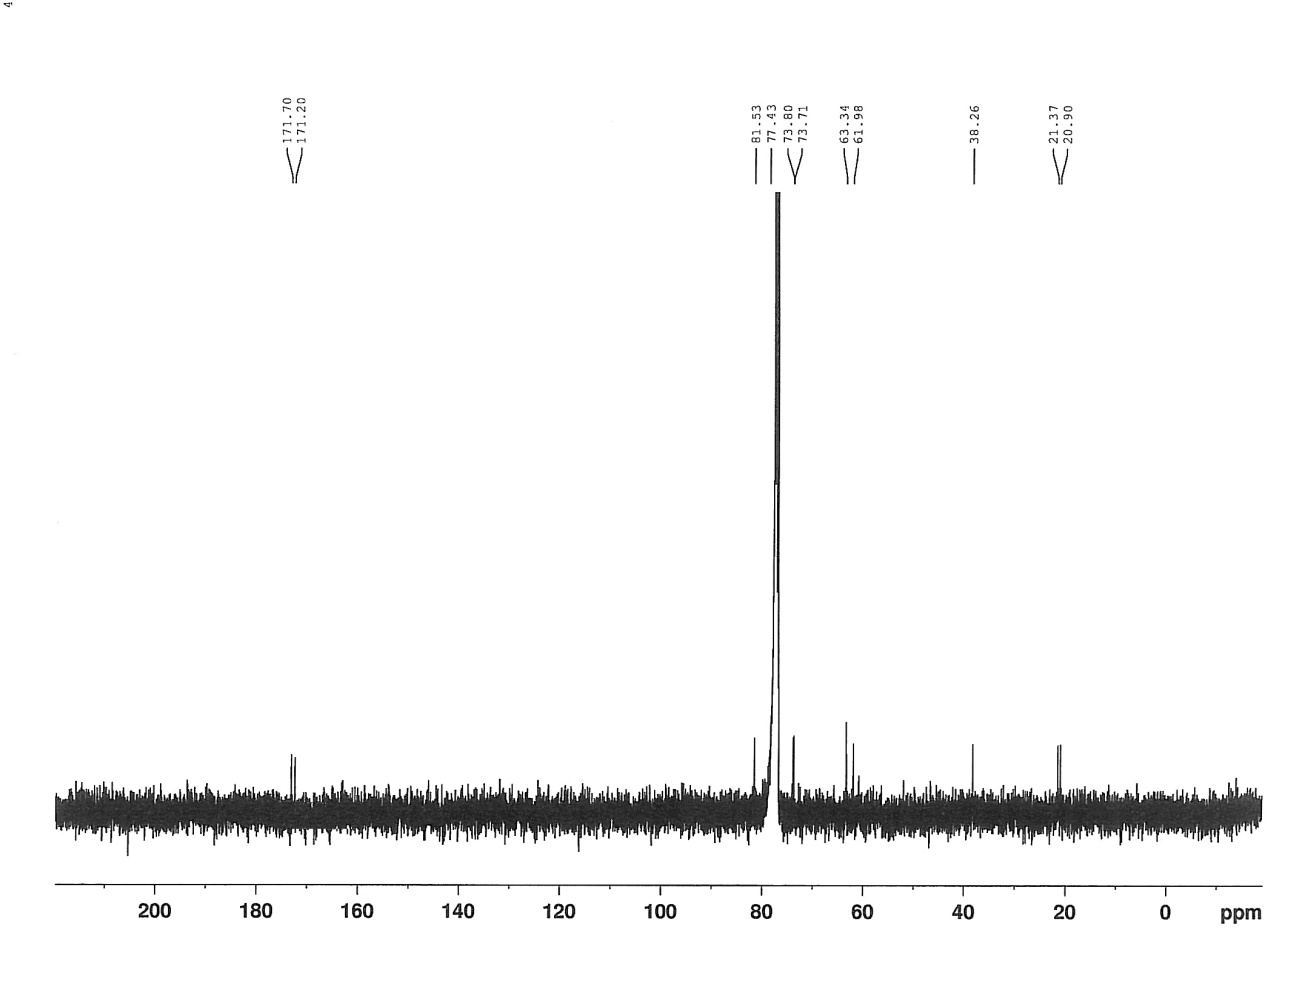


Compound **17**


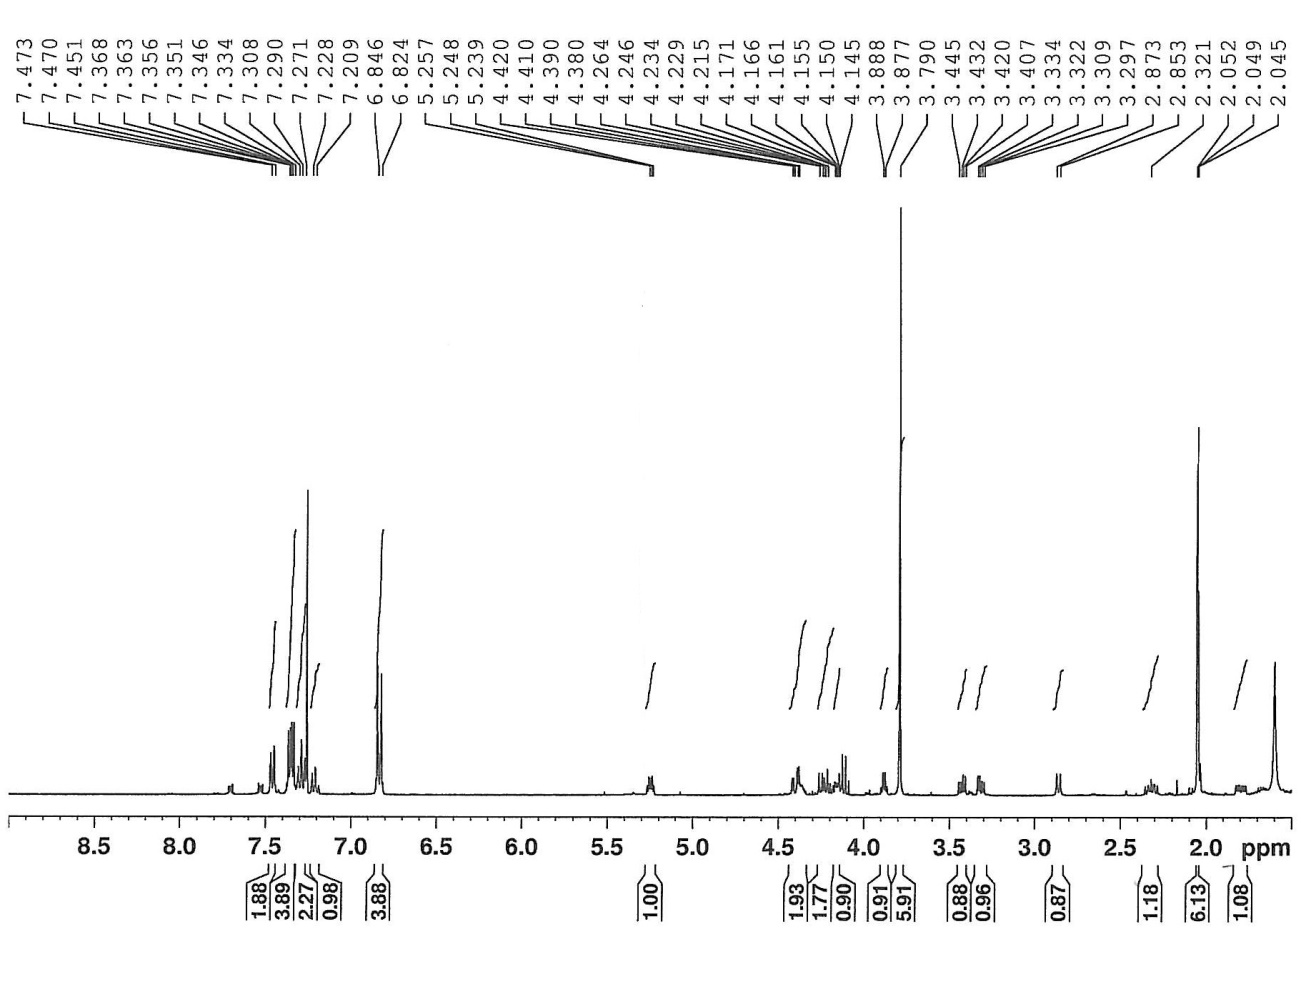


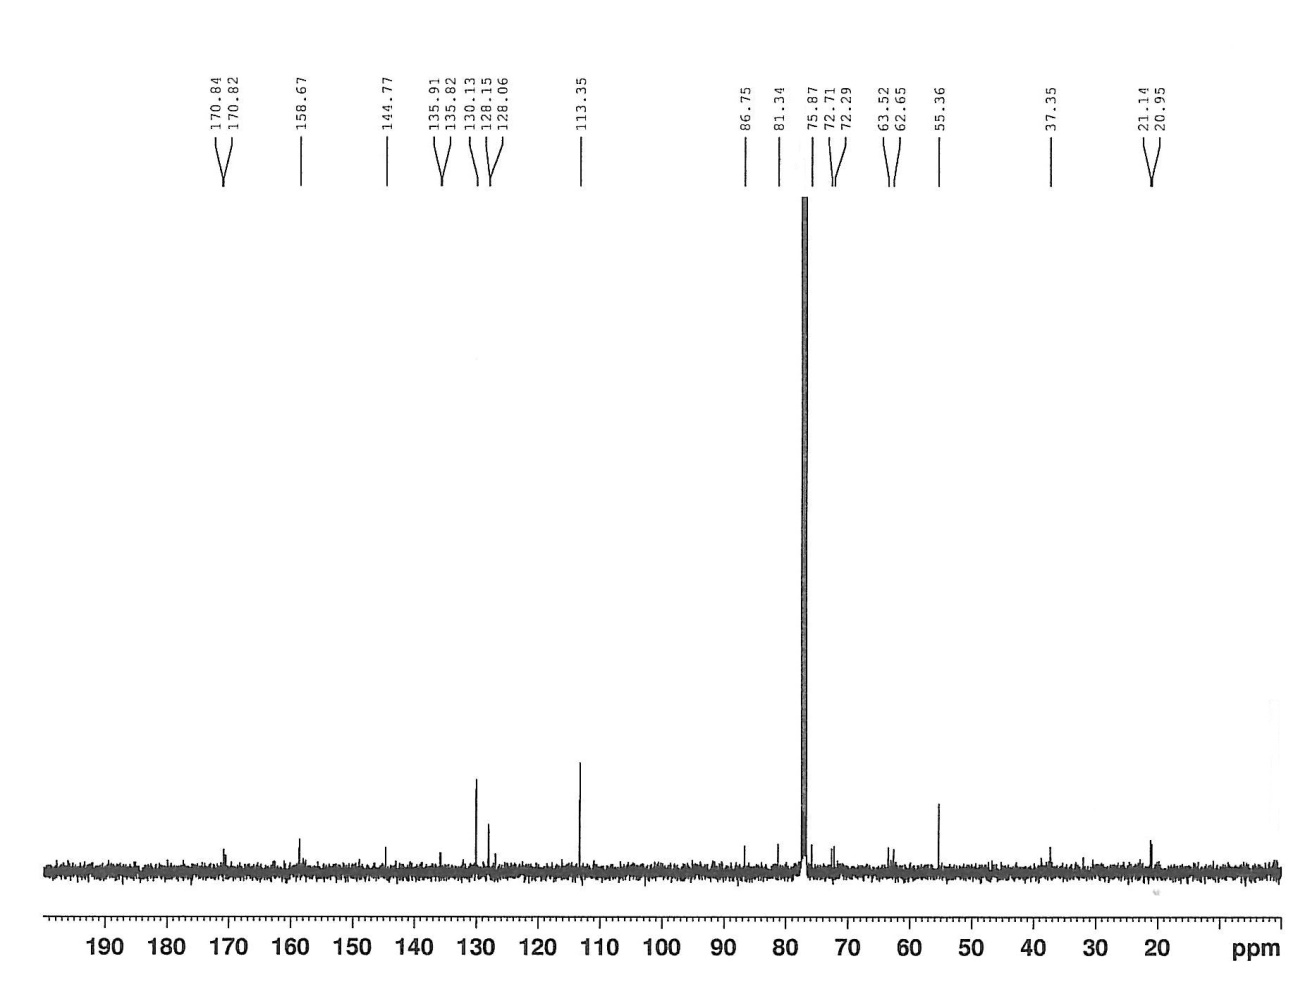


Compound **18**


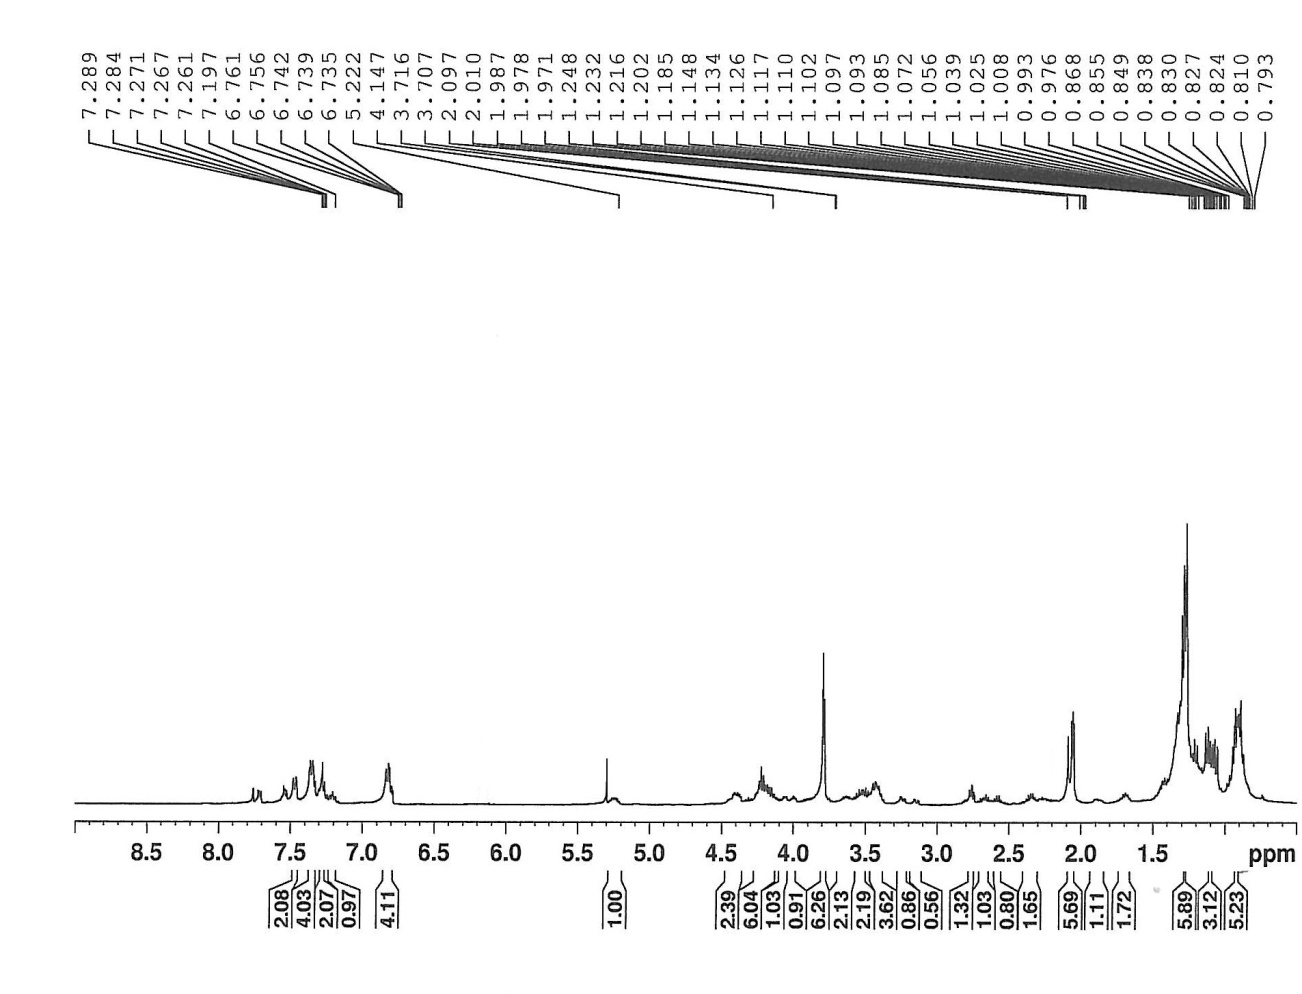


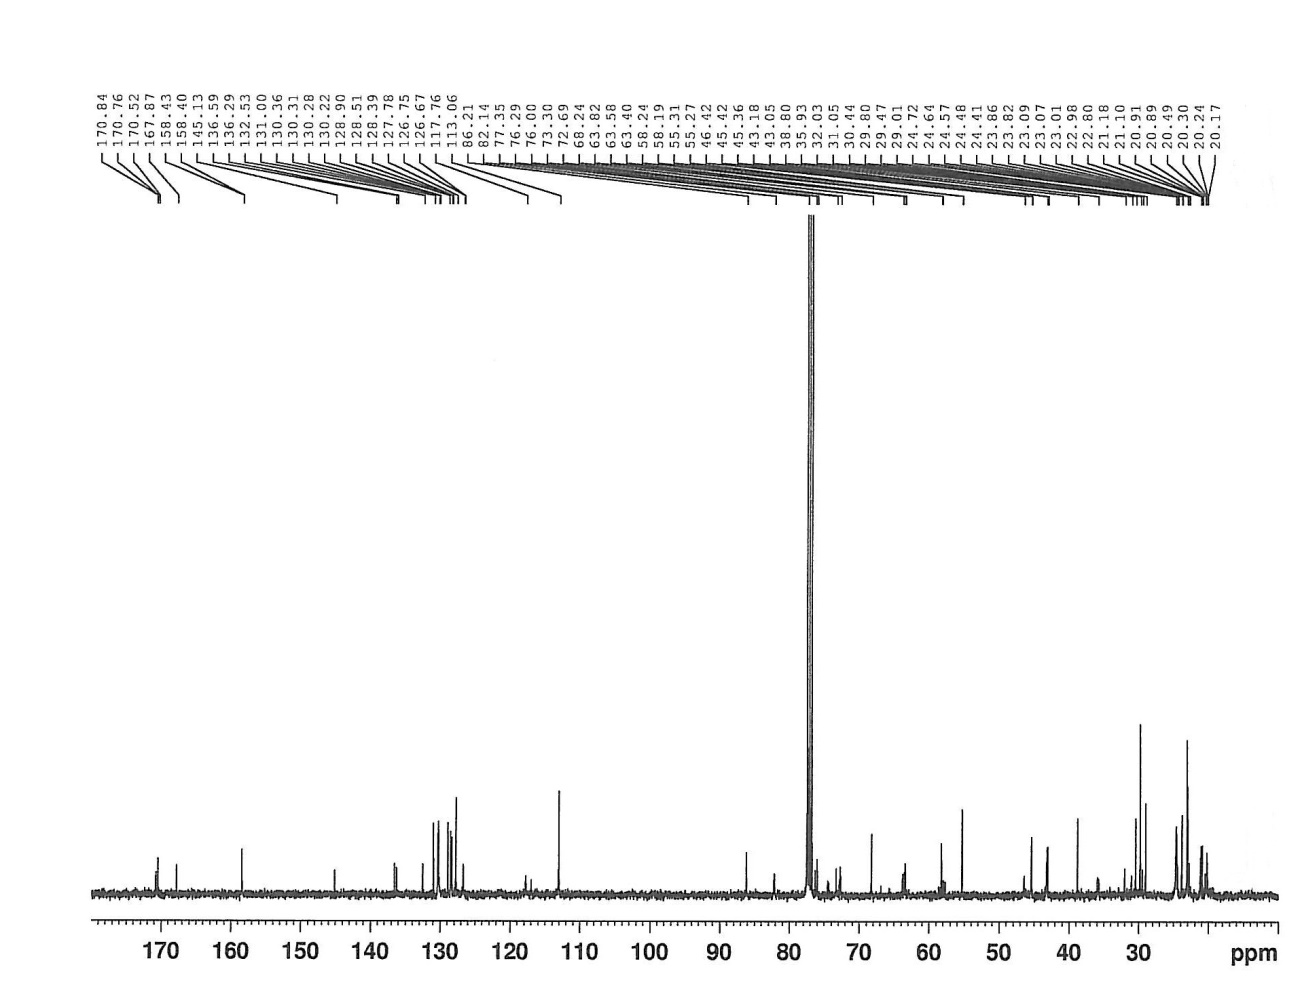


**Mass Spec of oligomer A**

**Mass Spec of oligomer B**

HPLC profile Sequence A after Poli-Pak II purification

HPLC profile Sequence B after Poli-Pak II purification
